# Supplementary material for: Mutasynthesis generates nine new pyrroindomycins
Source: Royal Society of Chemistry journal article supplement (doi:10.1039/d4ob00239c), 2024-01-01
Supplement: d4ob00239c1.pdf [file d4ob00239c1.pdf]

## Supporting Information

### Mutasynthesis Generates Nine New Pyrroindomycins

Zhuhua Wu,<sup>a,b,†</sup> Zhenxiang Xia,<sup>b,c,†</sup> ZhiJun Tang,<sup>b,\*</sup> Ji'an Li,<sup>a,\*</sup> Wen Liu<sup>b,\*</sup>

<sup>a</sup> National key Laboratory of Lead druggability Research, Shanghai Institute of Pharmaceutical Industry, China State Institute of Pharmaceutical Industry, 285 Copernicus Road, Shanghai 201203, China.

<sup>b</sup> State Key Laboratory of Chemical Biology, Shanghai Institute of Organic Chemistry, University of Chinese Academy of Sciences, Chinese Academy of Sciences, 345 Lingling Road, Shanghai 200032, China.

<sup>c</sup> Department of Pharmacy, Stomatological Hospital and Dental School of Tongji University, Shanghai Engineering Research Center of Tooth Restoration and Regeneration, 399 Middle Yan Chang Road, Shanghai, 200072, China.

\* To whom correspondence should be addressed: Shanghai Institute of Organic Chemistry, Chinese Academy of Sciences, 345 Lingling Rd., Shanghai 200032, China. ZhiJun Tang, Email: [tangzj@sioc.ac.cn](mailto:tangzj@sioc.ac.cn); Ji'an Li, E-mail: [liji\\_an@hotmail.com](mailto:liji_an@hotmail.com); and Wen Liu, Email: [wliu@sioc.ac.cn](mailto:wliu@sioc.ac.cn), Tel: 86-21-54925111, Fax: 86-21-64166128

† These authors equally contributed to this work.

## Table of Contents

|                                                                                                                  |    |
|------------------------------------------------------------------------------------------------------------------|----|
| 1. Experimental Procedures.....                                                                                  | 4  |
| 1.1 General Experimental Procedures. ....                                                                        | 4  |
| 1.2 Construction of the <i>pyrK1</i> Gene Inactivation Strain. ....                                              | 4  |
| Table S1. Strains and plasmid used in this study .....                                                           | 6  |
| Table S2 Primers used in this study. ....                                                                        | 6  |
| Figure S1 In-frame deletion of <i>pyrK1</i> and PCR verification of the mutant strain. ....                      | 6  |
| 1.3 Fermentation, Chemical Feeding and Metabolic Analysis. ....                                                  | 7  |
| 1.4 Isolation of the Compounds <b>4</b> and <b>5</b> .....                                                       | 7  |
| 2. Supplementary Results .....                                                                                   | 11 |
| 2.1 HR-MS and HR-MS/MS analysis of <b>3</b> .....                                                                | 11 |
| Figure S2 HR-MS analysis of <b>3</b> .....                                                                       | 11 |
| Figure S3 HR-MS/MS comparison of PYR-A, PYR-B and <b>3</b> . ....                                                | 12 |
| 2.2 HR-MS and HR-MS/MS analysis of <b>4</b> .....                                                                | 14 |
| Figure S4 HR-MS analysis of <b>4</b> .....                                                                       | 14 |
| Figure S5 HR-MS/MS analysis of <b>4</b> .....                                                                    | 15 |
| 2.3 HR-MS and HR-MS/MS analysis of <b>5</b> .....                                                                | 16 |
| Figure S6 HR-MS analysis of <b>5</b> .....                                                                       | 16 |
| Figure S7 HR-MS/MS analysis of <b>5</b> .....                                                                    | 17 |
| 2.4 Analysis of the structure model and catalytic function of PyrK1.....                                         | 18 |
| Figure S8 The reaction catalyzed by PrnB in pyrrolnigrin biosynthesis. ....                                      | 18 |
| Figure S9 Structure Alignment Analysis of PyrK1 and PrnB. ....                                                   | 18 |
| Figure S10 The known DHPI formation mechanisms.....                                                              | 19 |
| Figure S11 The proposed mechanism of PyrK1 for DHPI formation. ....                                              | 19 |
| Figure S12 HPLC-MS analysis of the production of <b>3</b> , <b>4</b> and <b>5</b> in <i>S. rugosporus</i> . .... | 20 |
| 2.5 Chemical structure and NMR spectrum of <b>4</b> and <b>5</b> .....                                           | 21 |
| Table S3 <sup>1</sup> H (500 MHz) and <sup>13</sup> C NMR (125 MHz) data of <b>4</b> and <b>5</b> .....          | 21 |
| Figure S13 NMR spectra of <b>4</b> in DMSO- <i>d</i> <sub>6</sub> . ....                                         | 23 |
| Figure S14 NMR spectra of <b>5</b> in DMSO- <i>d</i> <sub>6</sub> . ....                                         | 26 |
| 2.6 Detection of Products from Chemical Precursors Feeding. ....                                                 | 29 |
| Figure S15 HR-MS analysis of product <b>6</b> .....                                                              | 29 |

|                                                           |    |
|-----------------------------------------------------------|----|
| Figure S16 HR-MS/MS analysis of product <b>6</b> .....    | 30 |
| Figure S17 HR-MS of product <b>7</b> . .....              | 31 |
| Figure S18 HR-MS/MS analysis of product <b>7</b> . .....  | 32 |
| Figure S19 HR-MS analysis of product <b>8</b> . .....     | 33 |
| Figure S20 HR-MS/MS analysis of product <b>8</b> . .....  | 34 |
| Figure S21 HR-MS analysis of product <b>9</b> . .....     | 35 |
| Figure S22 HR-MS/MS analysis of product <b>9</b> . .....  | 36 |
| Figure S23 HR-MS analysis of product <b>10</b> . .....    | 37 |
| Figure S24 HR-MS/MS analysis of product <b>10</b> . ..... | 38 |
| Figure S25 HR-MS analysis of product <b>11</b> . .....    | 39 |
| Figure S26 HR-MS/MS analysis of product <b>11</b> . ..... | 40 |
| 3. Supplementary references .....                         | 41 |

# 1. Experimental Procedures

## 1.1 General Experimental Procedures.

**Materials, Strains, Plasmids and Primers.** Biochemicals and media were purchased from Sinopharm Chemical Reagent Co., Ltd. (China), Oxoid Ltd. (U.K.) or Sigma-Aldrich Co. LLC. (USA) unless otherwise stated. Restriction endonucleases were purchased from Thermo Fisher Scientific Co. Ltd. (USA). Chemical reagents were purchased from standard commercial sources. The bacterial strains, plasmids and primers used in this study are summarized in Tables S1 and S2, respectively.

**DNA isolation, Manipulation and Sequencing.** DNA isolation and manipulation in *Escherichia coli* and *Streptomyces rugosporus* were carried out according to standard methods.<sup>1-4</sup> Amplifications by polymerase chain reaction (PCR) were carried out on an Applied Biosystems Veriti Thermal Cycler (Thermo Fisher Scientific Inc., USA) using either Taq DNA polymerase (Vazyme Biotech Co. Ltd., China) for routine verification or PrimeSTAR HS DNA polymerase (Takara Biotechnology Co., Ltd., Japan) for high fidelity amplification. Primer synthesis was performed at Shanghai BioSune Biotech Co. Ltd. (China). DNA sequencing was performed at Shanghai TSINGKE Biotech Co. Ltd. (China).

**Sequence Analysis.** Open reading frames (ORFs) were identified using the FramePlot 4.0 beta program (<http://nocardia.nih.gov/fp4/>). The deduced proteins were compared with other known proteins in the databases using available BLAST methods (<http://blast.ncbi.nlm.nih.gov/Blast.cgi>). Structure models were built using AlphaFold2.0 and displayed via Pymol.

**Chemical Analysis.** High performance liquid chromatography (HPLC) analysis was carried out on an Agilent 1260 HPLC system (Agilent Technologies Inc., USA) equipped with a DAD detector. Semi-preparative HPLC was performed on an Agilent 1100 system. HPLC-electrospray ionization-mass spectrometry (HPLC-ESI-MS) and ESI-MS/MS were performed on a Thermo Fisher LTQ Fleet ESI-MS spectrometer (Thermo Fisher Scientific Inc., USA), and the data were analyzed using Thermo Xcalibur software. ESI-high resolution MS (ESI-HR-MS) analysis was carried out on an instrument consisting of a 1260 HPLC system and a 6538 UHD quadrupole time of flight (QTOF) high resolution mass spectrometry (Agilent Technologies, Santa Clara, USA). NMR data were recorded on a Bruker AV-500 (Bruker Co. Ltd, Germany).

## 1.2 Construction of the *pyrK1* Gene Inactivation Strain.

To inactivate *pyrK1* by in-frame deletion, the 2.370 kb fragment obtained by PCR using the primers K1-L-for/rev and the 2.252 kb fragment obtained by PCR using the primers K1-R-for/rev were cloned into the *EcoRI-HindIII* site of pKC1139, resulting in the generation of the recombinant plasmid pWL1001. It should be noted that within this plasmid, a specific 600 bp coding region of *pyrK1* was deleted. To transfer pWL1001 into *Streptomyces rugosporus* NRRL 21084, conjugation between *S. rugosporus* and *E. coli* ET12567 harboring pWL1001 was performed according a

method described previously,<sup>3</sup> yielding the recombinant strain WL1001. Briefly, approximately  $10^9$  *S. rugosporus* spores were suspended in TES (500 mL, 0.05 M, pH 8.0) and shocked by heating at 50°C for 10 min. TSB (500 mL) was then added for further incubation at 37°C for 3–5 h. Spores were recovered by centrifugation and resuspended in LB medium (2 mL) for recipient preparation. *E. coli* ET12567 containing the pWL1001 plasmid was grown in LB medium with apramycin to an OD<sub>600</sub> of 0.4–0.6. Cells from 50 mL of culture were recovered by centrifugation, washed twice with 20 mL LB medium, and resuspended in LB medium (1 mL) for use as the donor. Donor (100 mL) and recipients (100 mL) were mixed and distributed onto MS plates supplemented with 10 mM MgCl<sub>2</sub>. The plates were incubated at 30°C for 10–16 h and then overlaid with 1 mL water of containing nalidixic acid and apramycin (50 mg/mL) for *S. rugosporus* exconjugant selection. Incubation was continued at 30°C until exconjugants appeared. The colonies demonstrating resistance to apramycin at a temperature of 37°C were regarded as the integrating mutants, indicating that a single-crossover homologous recombination event had occurred. These mutants were subsequently cultivated on MS agar plates for five rounds in the absence of apramycin. The genotypes of resulting the strains that were apramycin-sensitive were selected and examined by PCR amplification and sequencing, ultimately leading to the identification of the recombinant strain WL1001 in which *pyrKI* was inactivated as designed.

**Table S1. Strains and plasmids used in this study**

| Strain/Plasmid                 | Relevant Characteristics                                                                                                                            | Source/Reference |
|--------------------------------|-----------------------------------------------------------------------------------------------------------------------------------------------------|------------------|
| <i>E. coli</i>                 |                                                                                                                                                     |                  |
| DH5 $\alpha$                   | Host for general cloning                                                                                                                            | Invitrogen       |
| ET12567                        | Donor strain for conjugation between <i>E. coli</i> and <i>Streptomyces</i>                                                                         | <sup>1</sup>     |
| <i>Streptomyces rugosporus</i> |                                                                                                                                                     |                  |
| NRRL 21084                     | Wild type, PYRs producing strain                                                                                                                    | NRRL             |
| WL1001                         | <i>pyrK1</i> in-frame deletion mutant, PYR non-producing                                                                                            | this study       |
| <b>Plasmids</b>                |                                                                                                                                                     |                  |
| pKC1139                        | <i>E. coli-Streptomyces</i> shuttle vector for gene inactivation, temperature sensitive replication in <i>Streptomyces</i> with apamycin resistance | <sup>2</sup>     |
| pWL1001                        | pKC1139 derivative containing 2.370 kb and 2.252 kb fragment for in-frame deletion of <i>pyrK1</i>                                                  | this study       |

**Table S2. Primers used in this study.**

| Gene ID      | Primer name | Primer sequence                             | Relevant characteristics |
|--------------|-------------|---------------------------------------------|--------------------------|
|              | K1-L-for    | GGGCTGCAGGTCGACTCTAGACATCATCATCAACAACCTGCTC | mutant construction      |
|              | K1-L-rev    | CGTAGGCGTCGAGCAGCATGCCGAGGTC                | mutant construction      |
|              | K1-R-for    | TGCTGCTCGACGCCTACGAGCGGAACG                 | mutant construction      |
|              | K1-R-rev    | ATCGCGCGCGCCGCGGATCCTGGTCGGCAGCATCACGC      | mutant construction      |
| <i>pyrK1</i> | K1-for      | AGATATACATATGCCCCAGACCACGACCCT              | mutant verification      |
|              | K1-rev      | GTGCTCGAGCCGCCCTCCGCCGCCGCGC                | mutant verification      |

**Figure S1. In-frame deletion of *pyrK1* and PCR verification of the mutant strain.**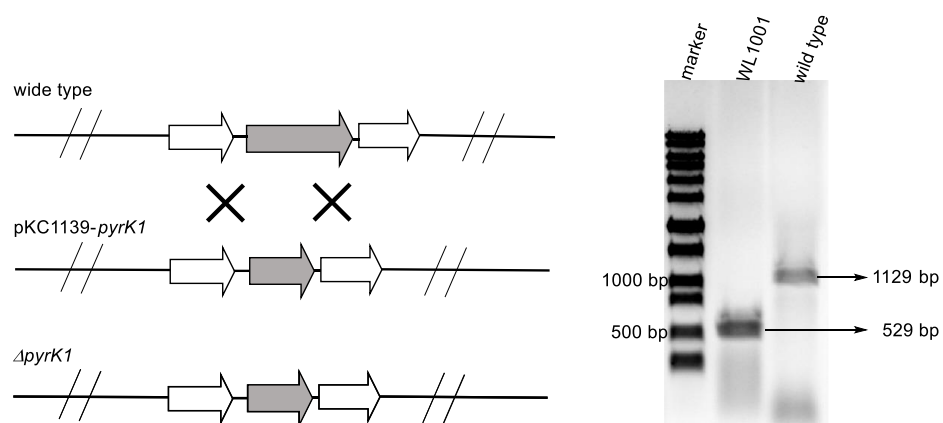

### 1.3 Fermentation, Chemical Feeding and Metabolic Analysis.

The fermentation was conducted following the method previously described by Qiongqiong Wu et al.<sup>1</sup> Briefly, in the primary fermentation, a 5-day cultured seed obtained from MS agar was inoculated into a 250-mL Erlenmeyer flask containing 50 mL of seed medium (composed of glucose 1%, soluble starch 2%, yeast extract 1%, N-Z Amine A 1%, and CaCO<sub>3</sub> 0.1% in tap water, pH 7.2). The flask was then incubated at 28°C and 220 rpm for 2 days. For the secondary fermentation, 5 mL of the seed culture broth was transferred into a 500-mL Erlenmeyer flask containing 100 mL of fermentation medium (comprised of glucose 3%, peptone 1%, yeast extract 1%, ammonium ferric citrate 0.1%, and CaCO<sub>3</sub> 0.1% in tap water, pH 6.5). This flask was incubated at 28°C and 220 rpm for 7 days. Ethyl acetate (50 mL) and fermentation broth (50 mL) were stirred rigorously under sonication for 20 min followed by centrifugation. The upper organic phase was removed. The solvent was concentrated under reduced pressure, and the residue was dissolved in methanol (1 mL). Product analysis was carried out on an Agilent Zorbax column (SB-C18, 5 μm, 4.6 x 250 mm, Agilent Technologies Inc., USA) using a DAD detector, by gradient elution of solvent A (H<sub>2</sub>O containing 0.1 % formic acid) and solvent B (CH<sub>3</sub>CN containing 0.1 % formic acid) at a flow rate of 1 mL/min over a 30-min gradient program as follows: T = 0 min, 30 % B; T = 5 min, 30 % B; T = 20 min, 80 % B; T = 23 min, 80 % B; T = 27 min, 30 % B, and T = 30 min, 30 % B (λ = 315 nm).

In the feeding experiment, aromatic carboxylic acid substrates with a final concentration of 2.5 mM were added during the middle of the logarithmic growth phase in the secondary fermentation. The culture was harvested on the seventh day. Products analysis were performed according to the method described above.

### 1.4 Isolation and Structure Characterization of the Compounds 4 and 5.

A volume of 100 L of fermentation broth from WL1001 was subjected to compounds isolation. The culture medium was centrifuged, and the resulting supernatant was extracted three times with 300 L of ethyl acetate (EtOAc). Following the concentration step, the crude extract was subjected to elution on an MCI CHP20P gel column (Mitsubishi Chemical Corporation, Japan) utilizing methanol solutions with varying concentrations (i.e., 50%, 60%, 70%, 80%, 90%, and 100%, respectively). The fractions corresponding to **4** and **5** were individually collected and subsequently applied onto a Sephadex LH-20 column (Mitsubishi Chemical Corporation, Japan) for further separation. Elution was carried out using methanol as the eluent. After crude concentration, the semipreparation of compound **4**, and **5** by HPLC was conducted on an Agilent Zorbax column (Agilent Zorbax SB-C18, 5 μm, 4.6 mm × 250 mm, Agilent Technologies Inc., USA) by gradient elution (315 nm over a 30-min gradient program: T = 0 min, 30 % B; T = 5 min, 30 % B; T = 20 min, 80 % B; T = 23 min, 80 % B; T = 27 min, 30 % B, and T = 30 min, 30 % B (solvent A, H<sub>2</sub>O containing 0.1 % formic acid; solvent B, CH<sub>3</sub>CN containing 0.1 % formic acid.)), yielding 16 mg of **4**, and 26 mg of **5** for NMR analysis.

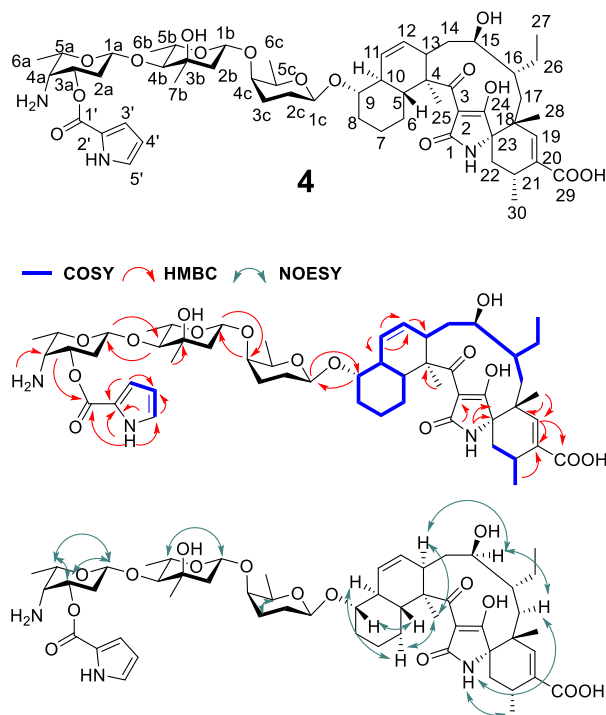

Compound **4** was obtained as colourless gum. HR-ESI-MS analysis of **4** exhibited a  $[M+H]^+$  ion at  $m/z$  1008.5441, consistent with the molecular formula  $C_{54}H_{78}N_3O_{15}$ . Investigation of the  $^1H$  and  $^{13}C$  NMR spectra indicated that a pyridine formic acyl group was observed in  $^1H$  NMR ( $\delta_H$  11.60, s; 6.90, s; 6.79, s; and 6.11, s) and  $^{13}C$  ( $\delta_C$  161.3, 126.2, 121.3, 108.5, and 110.9), one amino proton signal at  $\delta_H$  8.14 (1H, brs), one tri-substituted olenic proton signal at  $\delta_H$  6.32 (1H, s), two mono-substituted olenic proton signals at  $\delta_H$  5.56 (1H, d,  $J = 14.8, 7.8$  Hz), 5.67 (1H,  $J = 14.8, 10.8$  Hz), three anomeric proton in sugar moiety signals at  $\delta_H$  4.51 (1H, d,  $J = 8.5$  Hz), 4.73 (1H, brs), and 4.73 (1H, brs), three singlet methyls at  $\delta_H$  1.12, 1.26, and 1.76 (3H each, s). Then through analyzing the  $^{13}C$  NMR data, which indicated the existence of one carbonyl carbons at  $\delta_C$  201.3, one ester carbon at  $\delta_C$  161.3, one amide carbon at  $\delta_C$  163.0, one carboxylic acid at  $\delta_C$  167.9, six unsaturated carbons at  $\delta_C$  198.6, 146.4, 132.0, 132.0, 121.3, and 106.0, three anomeric carbon signals of sugar moiety at  $\delta_C$  101.0, 100.1, and 98.6, and 11 oxygenated/omiated carbons at  $\delta_C$  84.5, 81.7, 80.6, 75.2, 69.7, 69.7, 68.9, 66.6, 65.8, 63.1, and 51.3. The above data of  $^1H$  and  $^{13}C$  NMR were compared with those of PYR A and B showed they were identical, specifically, except for the data mentioned above of the pyridine formic acyl group. In other hand, given the bioinformatics analysis of the mutant strain product, which also involved in the biosynthesis of the DHPI moiety in PYR. The  $^1H$ - $^1H$  COSY experiment enabled the identification of the pyridine formic acyl group. As shown above, the  $^1H$ - $^1H$  COSY spectrum exhibited that H-4' correlated with H-3', H-5' correlated with H-3'. Together with HMBC and HSQC, suggesting a pyridine formic acid formed an ester bond with the hydroxyl at 3a.



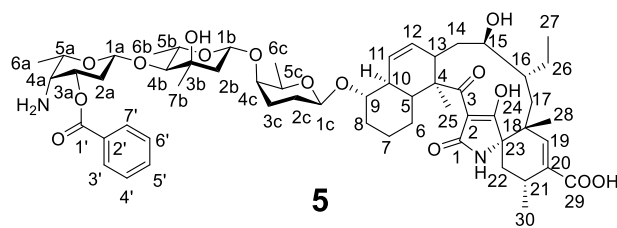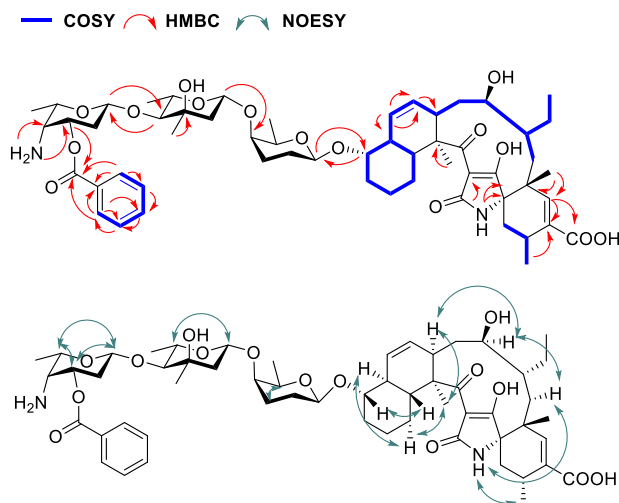

Compound **5** was isolated as colourless gum, whose molecular formula  $C_{56}H_{78}N_2O_{15}$  was deduced by HR-ESI-MS ( $[M+H]^+$  at  $m/z$  1019.5488, calcd. 1019.5480). Based on the analysis of the  $^1H$  NMR spectrum (Table S3), which suggested the presence of ABX system resonances at  $\delta_H$  7.81 (2H, d,  $J = 7.0$  Hz), 7.49 (1H, t,  $J = 7.2$  Hz) and 7.46 (2H, t,  $J = 7.2$  Hz), one amino proton signal at  $\delta_H$  8.24 (1H, brs), one tri-substituted olenic proton signal at  $\delta_H$  6.29 (1H, s), two mono-substituted olenic proton signals at  $\delta_H$  5.46 (1H, brd,  $J = 14.6$  Hz), 5.67 (1H, s), three anomeric proton in sugar moiety signals at  $\delta_H$  4.70 (1H,  $J = 8.3$  Hz), 4.69 (1H, brs), and 4.51 (1H, d,  $J = 9.0$  Hz), three singlet methyls at  $\delta_H$  1.19, 1.21, and 1.71 (3H each, s). Then through analyzing the  $^{13}C$  NMR data, which indicated the existence of one carbonyl carbons at  $\delta_c$  200.8, one ester carbon at  $\delta_c$  167.6, one carboxyl carbon at  $\delta_c$  168.4, one amide carbon at  $\delta_c$  163.8, twelve unsaturated carbons at  $\delta_c$  198.7, 148.0, 135.2, 133.2, 131.7, 130.9, 128.2, 128.2, 127.3, 127.3, 120.8, and 106.2, three anomeric carbon signals of sugar moiety at  $\delta_c$  100.8, 100.1, and 98.5, and 11 oxygenated/ominate carbons at  $\delta_c$  84.3, 82.5, 81.3, 75.2, 69.5, 69.5, 68.9, 65.7, 65.7, 63.1, and 52.1. The above data of  $^1H$  and  $^{13}C$  NMR were compared with those of PYR A and B showed they were identical, specifically, except for the data mentioned above of the characteristic ABX system in aromatic ring. However, **5** possessed extremely complex structure with many carbons and protons of similar chemical shifts, and was very difficult to elucidate only according to their NMR data. Comparison of the HR-MS/MS data of PYR-A, PYR-B and **5**, revealed the same pentacyclic aglycone and sugar fragments, but the different acyl fragment, indicating that the aromatic ring in **5** possibly replaced with benzoic acid in pyrroindomycin. To verify this speculation, the following  $^1H$ - $^1H$  COSY, HMBC, and HSQC experiments were performed. We focused on data of the aromatic ring-substituted deoxytrisaccharide side chain. The  $^1H$ - $^1H$  COSY correlations, combined with HSQC, DEPT spectra, revealed the existence of the substructures of H-3' to H-4', H-4' to H-5', H-5' to H-6', H-6' to H-7'. In the HMBC spectrum, correlations were observed from H-3' to C-2', C-4', C-7', and C-5', and from H-7' to C-2', C-6', C-

3', and C-5', therefore showing the connection of C-3'–C-2'–C-7'. Other HMBC correlations from H-3' to C-1' and H-7' to C-1' suggested the presence of the benzoyl group. Further HMBC correlation between H-3a and C-1' allowed the link of the benzoyl group to C-3a of deoxytrisaccharide. The inter-sugar linkages were then established on the basis of the HMBC correlations between H-1a ( $\delta_{\text{H}}$  4.51) and C-4b ( $\delta_{\text{C}}$  84.3), between H-1b ( $\delta_{\text{H}}$  4.70) and C-4c ( $\delta_{\text{C}}$  75.2), and the sugar-aglycone linkage was determined according to the correlation signal between H-9 ( $\delta_{\text{H}}$  3.54) and C-1<sub>C</sub> ( $\delta_{\text{C}}$  98.5). The relative configuration of dialkyldecalín moiety in **5** was similar to the PYR intermediates in our previous report.

## 2. Supplementary Results

### 2.1 HR-MS and HR-MS/MS analysis of 3.

Figure S2. HR-MS analysis of 3

#### Qualitative Analysis Report

|                               |              |                      |                      |
|-------------------------------|--------------|----------------------|----------------------|
| <b>Data Filename</b>          | 915.d        | <b>Sample Name</b>   |                      |
| <b>Sample Type</b>            | Sample       | <b>Position</b>      | Vial 61              |
| <b>Instrument Name</b>        | Instrument 1 | <b>User Name</b>     |                      |
| <b>Acq Method</b>             | I3.m         | <b>Acquired Time</b> | 9/22/2023 1:35:06 PM |
| <b>IRM Calibration Status</b> | Success      | <b>DA Method</b>     | FGFUS-C18.m          |
| <b>Comment</b>                |              |                      |                      |

|                       |                             |              |
|-----------------------|-----------------------------|--------------|
| <b>Sample Group</b>   |                             | <b>Info.</b> |
| <b>Acquisition SW</b> | 6200 series TOF/6500 series |              |
| <b>Version</b>        | Q-TOF B.05.01 (B5125.3)     |              |

#### User Spectra

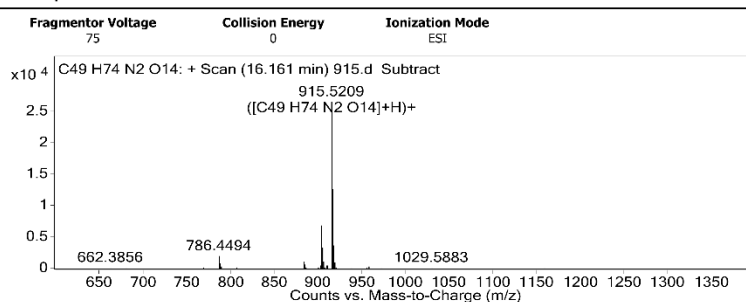

#### Peak List

| m/z      | z | Abund    | Formula        | Ion    |
|----------|---|----------|----------------|--------|
| 915.5209 | 1 | 25396.85 | C49 H74 N2 O14 | (M+H)+ |
| 916.5227 | 1 | 12772.39 | C49 H74 N2 O14 | (M+H)+ |
| 917.5274 | 1 | 3773.54  | C49 H74 N2 O14 | (M+H)+ |
| 918.5256 | 1 | 1009.68  | C49 H74 N2 O14 | (M+H)+ |
| 919.5295 | 1 | 341.78   | C49 H74 N2 O14 | (M+H)+ |

#### Formula Calculator Element Limits

| Element | Min | Max |
|---------|-----|-----|
| C       | 12  | 70  |
| H       | 0   | 120 |
| O       | 1   | 20  |
| N       | 1   | 4   |

#### Formula Calculator Results

| Ion Formula    | m/z      | m/z (Calc) | DBE  | Diff (ppm) | Score (MFG) |
|----------------|----------|------------|------|------------|-------------|
| C64 H69 N O4   | 915.5209 | 915.5221   | 31.5 | 1.32       | 98.64       |
| C62 H67 N4 O3  | 915.5209 | 915.5208   | 32   | -0.14      | 99.98       |
| C49 H75 N2 O14 | 915.5209 | 915.5213   | 14   | 0.42       | 99.86       |
| C46 H77 N O17  | 915.5209 | 915.5186   | 9.5  | -2.51      | 95.29       |

--- End Of Report ---

**Figure S3. HR-MS/MS comparison of PYR-A (A), PYR-B (B) and 3 (C).**

**(A)**

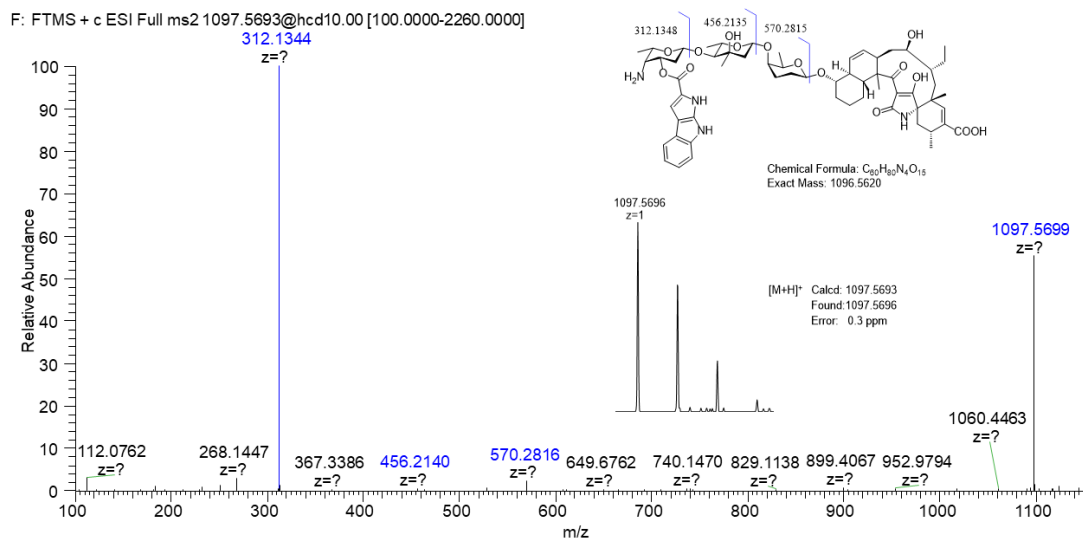

**(B)**

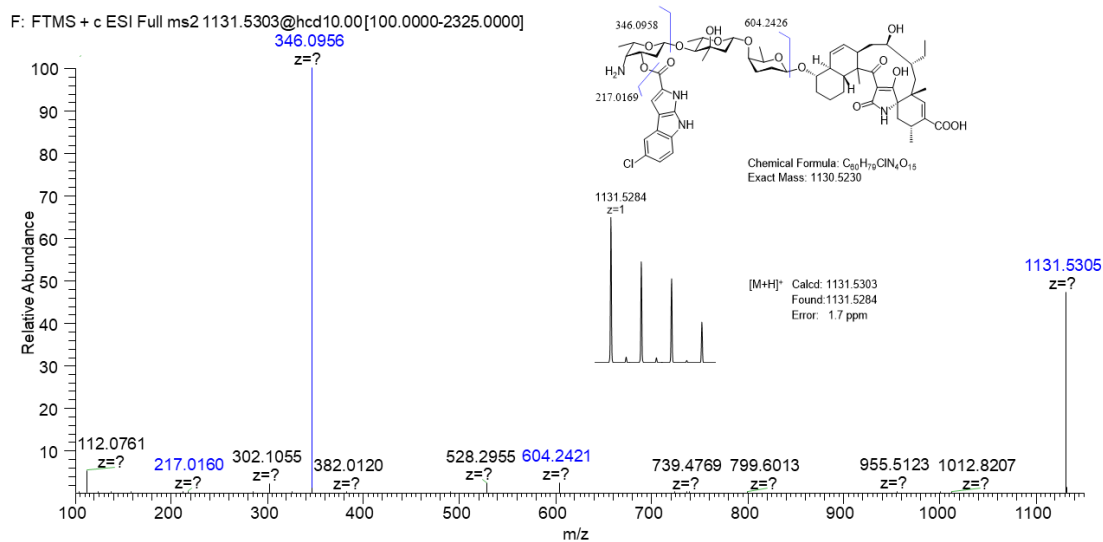

(C)

F: FTMS + c ESI Full ms2 915.5213@hcd10.00[100.0000-1885.0000]

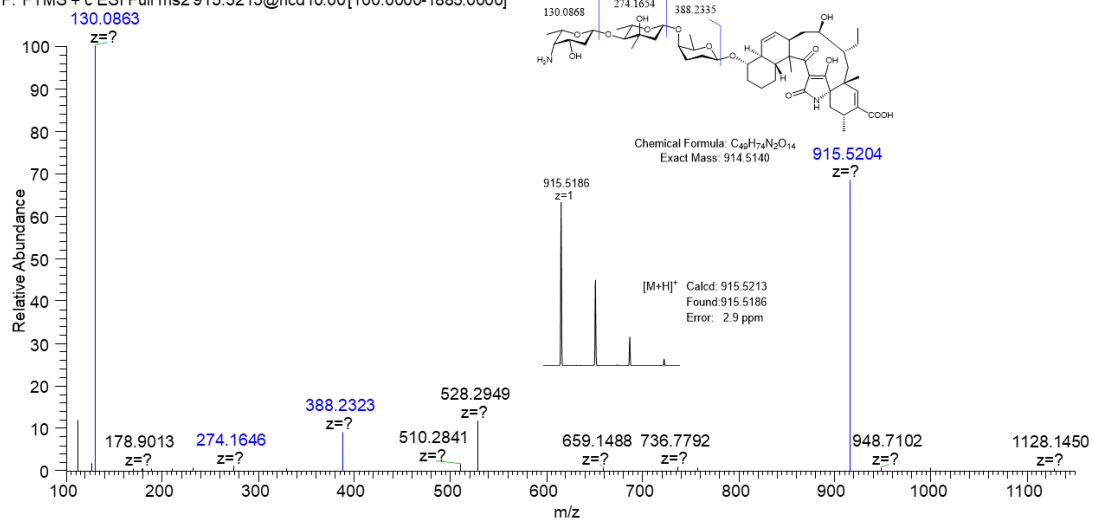

## 2.2 HR-MS and HR-MS/MS analysis of 4.

Figure S4. HR-MS analysis of 4.

### Qualitative Analysis Report

|                               |                             |                      |                      |
|-------------------------------|-----------------------------|----------------------|----------------------|
| <b>Data Filename</b>          | 1008.d                      | <b>Sample Name</b>   |                      |
| <b>Sample Type</b>            | Sample                      | <b>Position</b>      | Vial 62              |
| <b>Instrument Name</b>        | Instrument 1                | <b>User Name</b>     |                      |
| <b>Acq Method</b>             | I3.m                        | <b>Acquired Time</b> | 9/22/2023 2:08:36 PM |
| <b>IRM Calibration Status</b> | Success                     | <b>DA Method</b>     | FGFUS-C18.m          |
| <b>Comment</b>                |                             |                      |                      |
| <b>Sample Group</b>           |                             | <b>Info.</b>         |                      |
| <b>Acquisition SW</b>         | 6200 series TOF/6500 series |                      |                      |
| <b>Version</b>                | Q-TOF B.05.01 (85125.3)     |                      |                      |

#### User Spectra

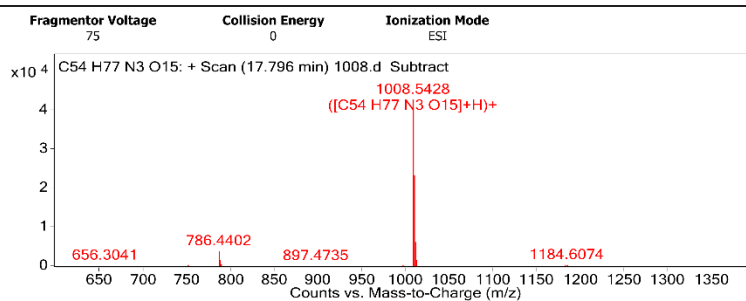

#### Peak List

| m/z       | z | Abund    | Formula        | Ion                |
|-----------|---|----------|----------------|--------------------|
| 1008.5428 | 1 | 40738.81 | C54 H77 N3 O15 | (M+H) <sup>+</sup> |
| 1009.5456 | 1 | 23293.49 | C54 H77 N3 O15 | (M+H) <sup>+</sup> |
| 1010.5460 | 1 | 6340.73  | C54 H77 N3 O15 | (M+H) <sup>+</sup> |
| 1011.5474 | 1 | 1687.6   | C54 H77 N3 O15 | (M+H) <sup>+</sup> |
| 1012.5512 | 1 | 310.16   | C54 H77 N3 O15 | (M+H) <sup>+</sup> |

#### Formula Calculator Element Limits

| Element | Min | Max |
|---------|-----|-----|
| C       | 12  | 70  |
| H       | 0   | 120 |
| O       | 1   | 20  |
| N       | 1   | 4   |

#### Formula Calculator Results

| Ion Formula    | m/z       | m/z (Calc) | DBE  | Diff (ppm) | Score (MFG) |
|----------------|-----------|------------|------|------------|-------------|
| C69 H72 N2 O5  | 1008.5428 | 1008.5436  | 35.5 | 0.77       | 99.51       |
| C66 H74 N O8   | 1008.5428 | 1008.5409  | 31   | -1.89      | 97.13       |
| C57 H76 N4 O12 | 1008.5428 | 1008.5454  | 22.5 | 2.61       | 94.7        |
| C54 H78 N3 O15 | 1008.5428 | 1008.5427  | 18   | -0.05      | 100         |
| C51 H80 N2 O18 | 1008.5428 | 1008.5401  | 13.5 | -2.71      | 94.28       |

--- End Of Report ---

Figure S5. HR-MS/MS analysis of 4.

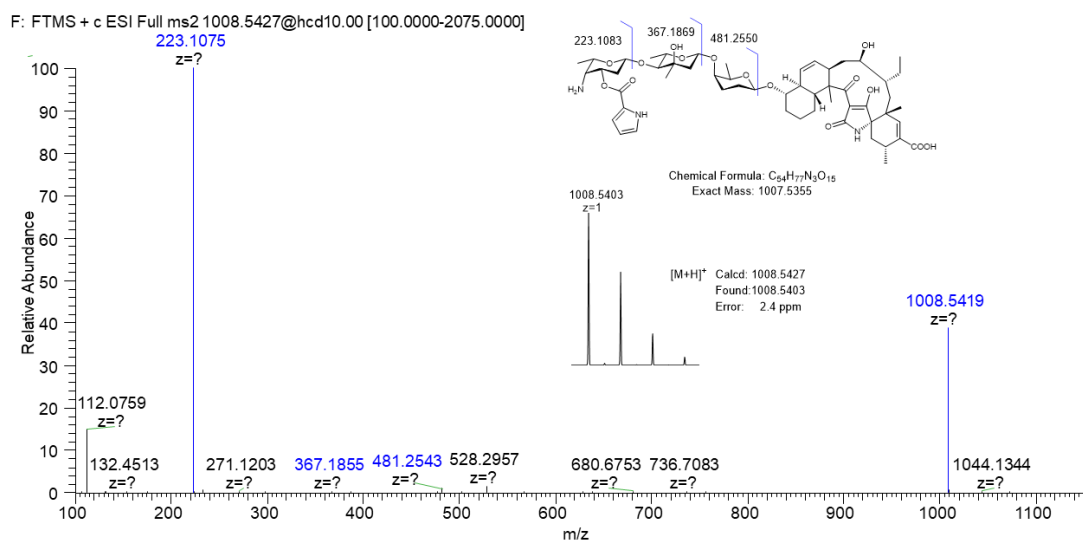

## 2.3 HR-MS and HR-MS/MS analysis of 5.

Figure S6. HR-MS analysis of 5.

### Qualitative Analysis Report

|                               |                             |                      |                      |
|-------------------------------|-----------------------------|----------------------|----------------------|
| <b>Data Filename</b>          | 1019.d                      | <b>Sample Name</b>   |                      |
| <b>Sample Type</b>            | Sample                      | <b>Position</b>      | Vial 63              |
| <b>Instrument Name</b>        | Instrument 1                | <b>User Name</b>     |                      |
| <b>Acq Method</b>             | I3.m                        | <b>Acquired Time</b> | 9/22/2023 2:42:07 PM |
| <b>IRM Calibration Status</b> | Success                     | <b>DA Method</b>     | FGFUS-C18.m          |
| <b>Comment</b>                |                             |                      |                      |
| <b>Sample Group</b>           |                             | <b>Info.</b>         |                      |
| <b>Acquisition SW</b>         | 6200 series TOF/6500 series |                      |                      |
| <b>Version</b>                | Q-TOF B.05.01 (B5125.3)     |                      |                      |

#### User Spectra

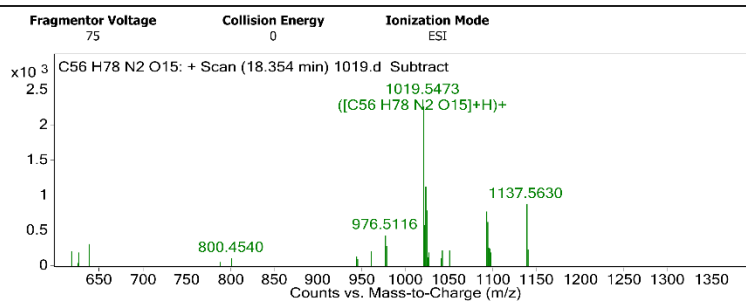

#### Peak List

| m/z       | z | Abund   | Formula        | Ion    |
|-----------|---|---------|----------------|--------|
| 1019.5473 | 1 | 2270.23 | C56 H78 N2 O15 | (M+H)+ |
| 1020.5464 | 1 | 1623.55 | C56 H78 N2 O15 | (M+H)+ |
| 1021.5513 | 1 | 600.88  | C56 H78 N2 O15 | (M+H)+ |

#### Formula Calculator Element Limits

| Element | Min | Max |
|---------|-----|-----|
| C       | 12  | 70  |
| H       | 0   | 120 |
| O       | 1   | 20  |
| N       | 1   | 4   |

#### Formula Calculator Results

| Ion Formula    | m/z       | m/z (Calc) | DBE  | Diff (ppm) | Score (MFG) |
|----------------|-----------|------------|------|------------|-------------|
| C71 H73 N O5   | 1019.5473 | 1019.5483  | 36.5 | 1.01       | 99.16       |
| C69 H71 N4 O4  | 1019.5473 | 1019.5470  | 37   | -0.31      | 99.92       |
| C66 H73 N3 O7  | 1019.5473 | 1019.5443  | 32.5 | -2.94      | 93.31       |
| C59 H77 N3 O12 | 1019.5473 | 1019.5502  | 23.5 | 2.82       | 93.8        |
| C56 H79 N2 O15 | 1019.5473 | 1019.5475  | 19   | 0.19       | 99.97       |
| C53 H81 N O18  | 1019.5473 | 1019.5448  | 14.5 | -2.44      | 95.3        |

--- End Of Report ---



Figure S7. HR-MS/MS analysis of 5.

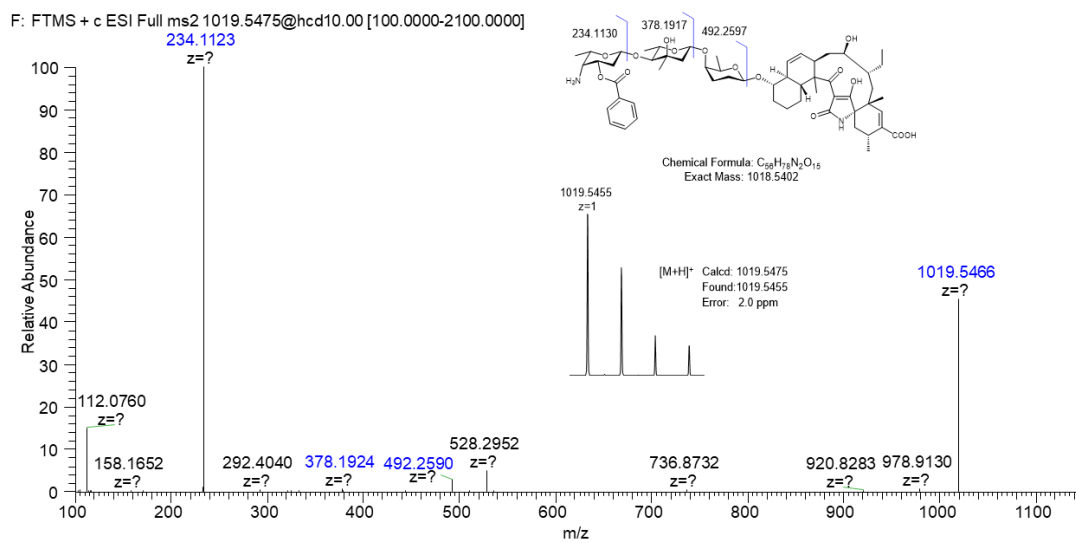

## 2.4 Analysis of the structure model and catalytic function of PyrK1

Figure S8. The reaction catalyzed by PrnB in pyrrolniyrin biosynthesis.<sup>4</sup>

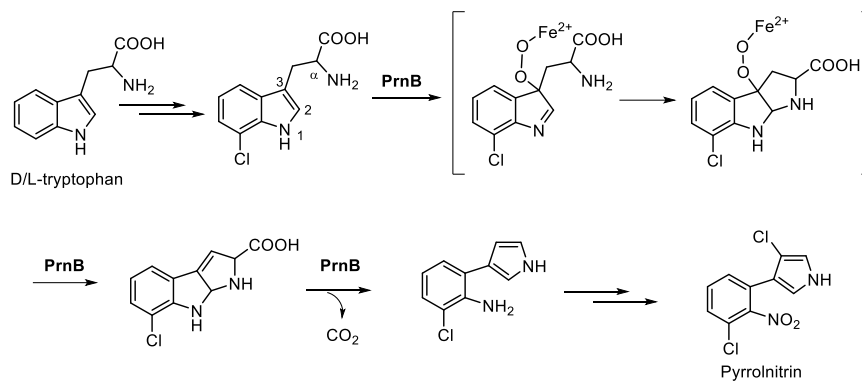

Figure S9. Structure alignment analysis of PyrK1 and PrnB. (A) Structure model of PyrK1 by AlphaFold2. (B) The crystal structure of PrnB (PDB:2v7j).<sup>5</sup> (C) Structure alignment of PyrK1 (blue) and PrnB (green). Both approaches give similar structures with RMSD = 1.5 Å.

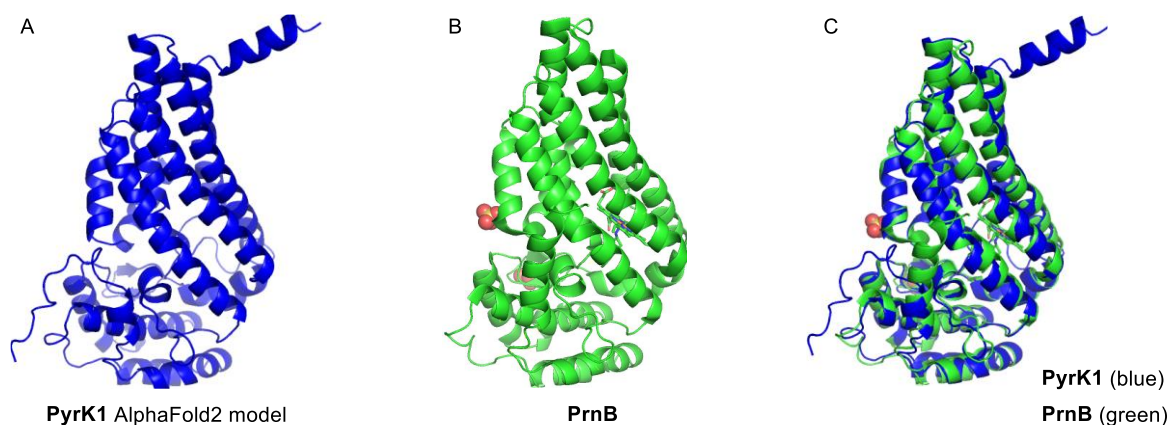

**Figure S10. The known DHPI formation mechanisms.** (A) Alkylation and cyclization mechanisms mediated by methyltransferases (MT),<sup>6</sup> prenyltransferases (PT)<sup>7,8</sup>. (B) Oxidation and cyclization mechanisms mediated by cytochrome P450s<sup>9,10,11</sup> and flavin-dependent monooxygenases (FMO).<sup>12,13</sup>

A. alkylation and cyclization mechanism:

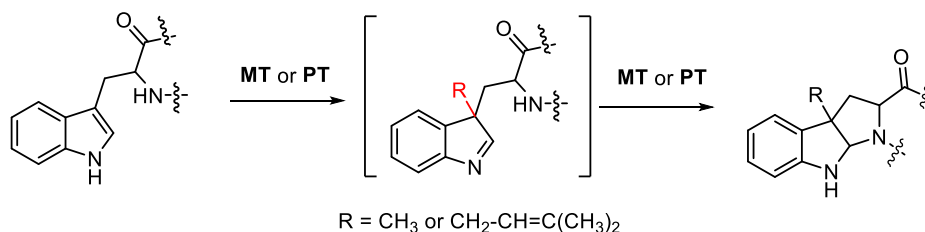

B. oxidation and cyclization mechanism:

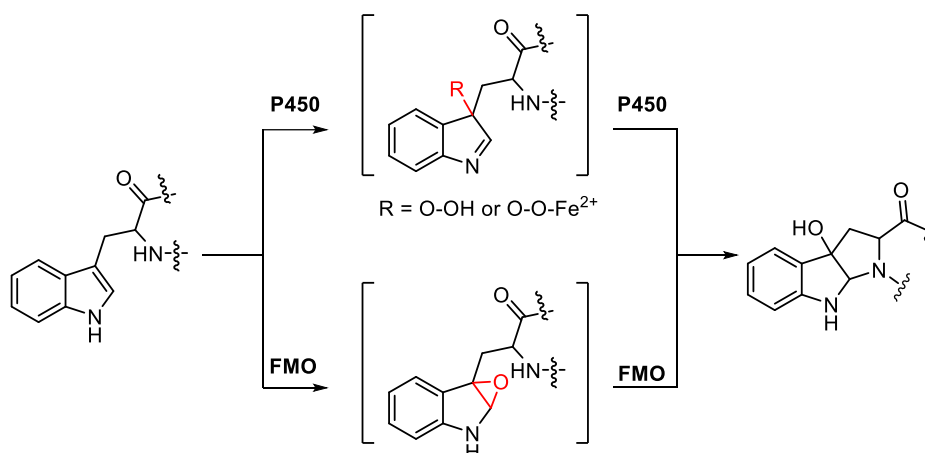

**Figure S11. The proposed mechanism of PyrK1 for DHPI formation.** Likely, PyrK1 initiates the process by activating tryptophan through C3-peroxidative activation like PrnB,<sup>4</sup> followed by a nucleophilic attack of the  $\alpha$ -amine group on the active C2 position to form the tricyclic pyrrolo[2,3-b]indole core, then, continues with peroxide elimination and oxidative desaturation to complete DHPI construction.

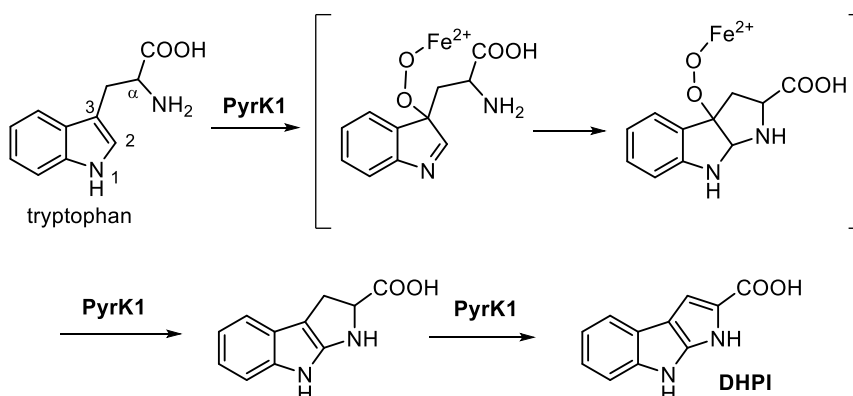

**Figure S12. HPLC-MS analysis of the production of 3, 4 and 5 in *S. rugosporus*.** For EICs, ESI  $m/z$   $[M + H]^+$  modes for **3**, **4**, **5**, **PYR-A** and **PYR-B** are 915.5, 1008.5, 1019.5, 1097.5 and 1131.5, respectively. (i) Wild-type strain; (ii)  $\Delta pyrK1$  mutant strain.

**EIC:** 915.5, 1008.5, 1019.5, 1097.5, 1131.5

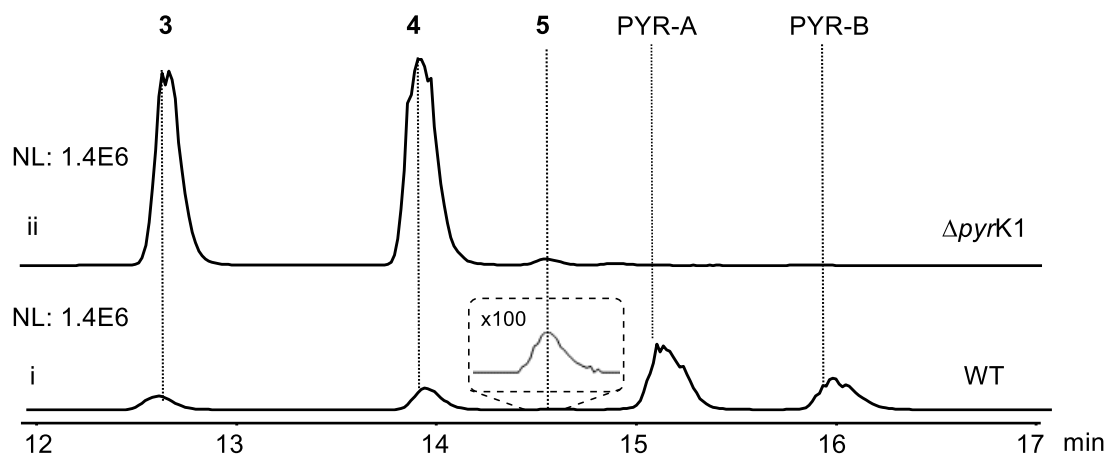

## 2.5 Chemical structure and NMR spectrum of 4 and 5.

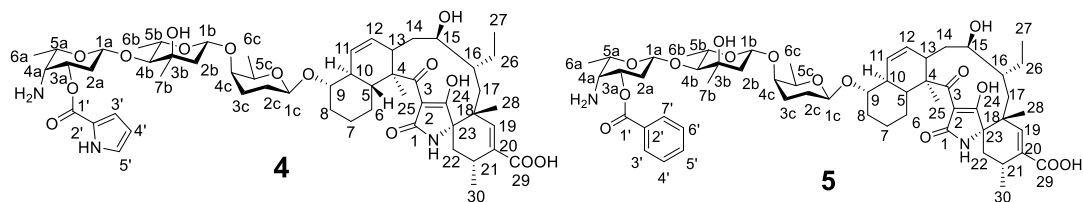

**Table S3.**  $^1\text{H}$  (500 MHz) and  $^{13}\text{C}$  NMR (125 MHz) data of 4 and 5 ( $\delta$  in ppm,  $J$  in Hz, DMSO- $d_6$ )

| No.  | 4          |                      | 5          |                            |
|------|------------|----------------------|------------|----------------------------|
|      | $\delta_c$ | $\delta_H(J$ in Hz)  | $\delta_c$ | $\delta_H(J$ in Hz)        |
| 1    | 163.0      |                      | 163.8      |                            |
| 2    | 106.0      |                      | 106.2      |                            |
| 3    | 201.3      |                      | 200.8      |                            |
| 4    | 50.3       |                      | 50.2       |                            |
| 5    | 38.8       | 1.33, ov             | 38.4       | 1.28, ov                   |
| 6    | 28.5       | 1.12, ov<br>2.42, ov | 29.0       | 1.02, ov<br>2.16, t (10.2) |
| 7    | 24.1       | 1.76, ov<br>1.51, ov | 24.3       | 1.79, ov<br>1.48, ov       |
| 8    | 35.4       | 1.92, ov<br>1.46, ov | 35.3       | 1.84, ov<br>1.73, ov       |
| 9    | 80.6       | 3.54, m              | 81.3       | 3.54, m                    |
| 10   | 43.0       | 1.67, ov             | 44.3       | 1.81, ov                   |
| 11   | 121.3      | 5.56, dd (14.8,7.8)  | 120.8      | 5.46, brd (14.6)           |
| 12   | 132.0      | 5.67, dd(14.8,10.8)  | 133.2      | 5.67, s                    |
| 13   | 43.8       | 2.77, m              | 43.0       | 2.97, m                    |
| 14   | 44.3       | 1.35, ov<br>1.25, ov | 44.7       | 1.78, ov<br>1.42, ov       |
| 15   | 81.7       | 3.03, ov             | 82.5       | 2.99, ov                   |
| 16   | 43.9       | 0.75, m              | 43.2       | 0.78, m                    |
| 17   | 45.3       | 1.82, ov<br>1.45, ov | 45.2       | 1.82, ov<br>1.45, ov       |
| 18   | 44.2       |                      | 45.1       |                            |
| 19   | 146.4      | 6.32, s              | 148.0      | 6.29, s                    |
| 20   | 132.0      |                      | 131.7      |                            |
| 21   | 26.1       | 2.79, m              | 26.7       | 2.63, m                    |
| 22   | 35.4       | 2.56, ov<br>1.42, ov | 35.3       | 2.54, ov<br>1.44, ov       |
| 23   | 63.1       |                      | 63.1       |                            |
| 23NH |            | 8.14, s              |            | 8.24, s                    |
| 24   | 198.6      |                      | 198.7      |                            |

|      |       |                      |       |                      |
|------|-------|----------------------|-------|----------------------|
| 25   | 14.6  | 1.76, s              | 14.6  | 1.49, s              |
| 26   | 25.1  | 1.43, ov<br>1.07, ov | 25.0  | 1.42, ov<br>1.06, ov |
| 27   | 13.3  | 0.84, t (7.6)        | 13.9  | 0.83, t (7.6)        |
| 28   | 22.3  | 1.12, s              | 22.9  | 0.85, s              |
| 29   | 167.9 |                      | 168.4 |                      |
| 30   | 20.8  | 1.17, t (7.6)        | 22.5  | 1.05, t (7.6)        |
| 1a   | 101.0 | 4.51, d (8.5)        | 100.8 | 4.51, d (9.0)        |
| 2a   | 34.4  | 2.01, ov<br>1.65, ov | 33.7  | 1.99, ov<br>1.71, ov |
| 3a   | 66.6  | 3.83, m              | 65.7  | 3.84, m              |
| 4a   | 51.3  | 4.13, m              | 52.1  | 4.17, m              |
| 5a   | 69.7  | 3.58, m              | 69.5  | 3.61, m              |
| 6a   | 17.2  | 1.20, ov             | 17.4  | 1.23, ov             |
| 1b   | 100.1 | 4.73, brs            | 100.1 | 4.70, d (8.3)        |
| 2b   | 43.0  | 1.82, ov<br>1.44, ov | 44.5  | 1.83, ov<br>1.47, ov |
| 3b   | 69.7  |                      | 69.5  |                      |
| 4b   | 84.5  | 3.06, d (9.5)        | 84.3  | 3.05, d (8.7)        |
| 5b   | 68.9  | 3.70, m              | 68.9  | 3.64, m              |
| 6b   | 18.1  | 1.17, d (6.3)        | 18.5  | 1.16, d (7.4)        |
| 7b   | 27.6  | 1.26, s              | 27.6  | 1.19, s              |
| 1c   | 98.6  | 4.73, brs            | 98.5  | 4.69, brs            |
| 2c   | 24.1  | 1.80, ov<br>1.37, ov | 23.8  | 1.83, ov<br>1.38, ov |
| 3c   | 24.5  | 1.80, ov<br>1.34, ov | 24.3  | 1.81, ov<br>1.32, ov |
| 4c   | 75.2  | 3.44, m              | 75.2  | 3.46, m              |
| 5c   | 65.8  | 3.86, m              | 65.7  | 3.87, m              |
| 6c   | 16.9  | 1.11, d (6.5)        | 16.9  | 1.16, d (7.4)        |
| 1'   | 161.3 |                      | 167.6 |                      |
| 2'   | 126.2 |                      | 135.2 |                      |
| 3'   | 108.5 | 6.11, s              | 127.3 | 7.81, d (7.0)        |
| 4'   | 110.9 | 6.79, s              | 128.2 | 7.46, t (7.2)        |
| 5'   | 121.3 | 6.90, s              | 130.9 | 7.49, t (7.2)        |
| 6'   |       |                      | 128.2 | 7.46, t (7.2)        |
| 7'   |       |                      | 127.3 | 7.81, d (7.0)        |
| 4'NH |       | 11.60, s             |       |                      |

In DMSO-*d*<sub>6</sub>, 500 MHz for <sup>1</sup>H and 125 MHz for <sup>13</sup>C NMR. Chemical shifts were reported in ppm. ov = overlapped. All signals were determined according to COSY, HSQC, HMBC, and NOESY correlations.

**Figure S13. NMR spectra of 4 in DMSO-d<sub>6</sub>. (A) <sup>1</sup>H spectrum. (B) <sup>13</sup>C spectrum. (C) 1H-1H COSY spectrum. (D) HSQC spectrum. (E) HMBC spectrum. (F) NOESY spectrum.**

(A)

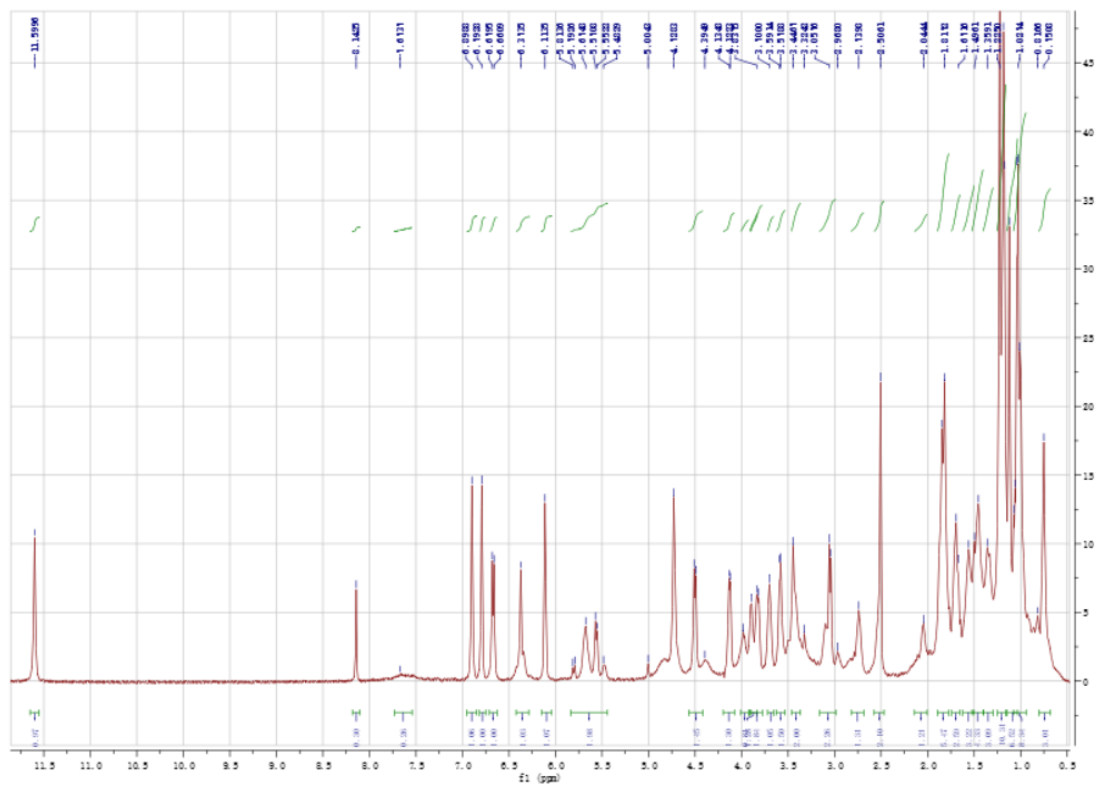

(B)

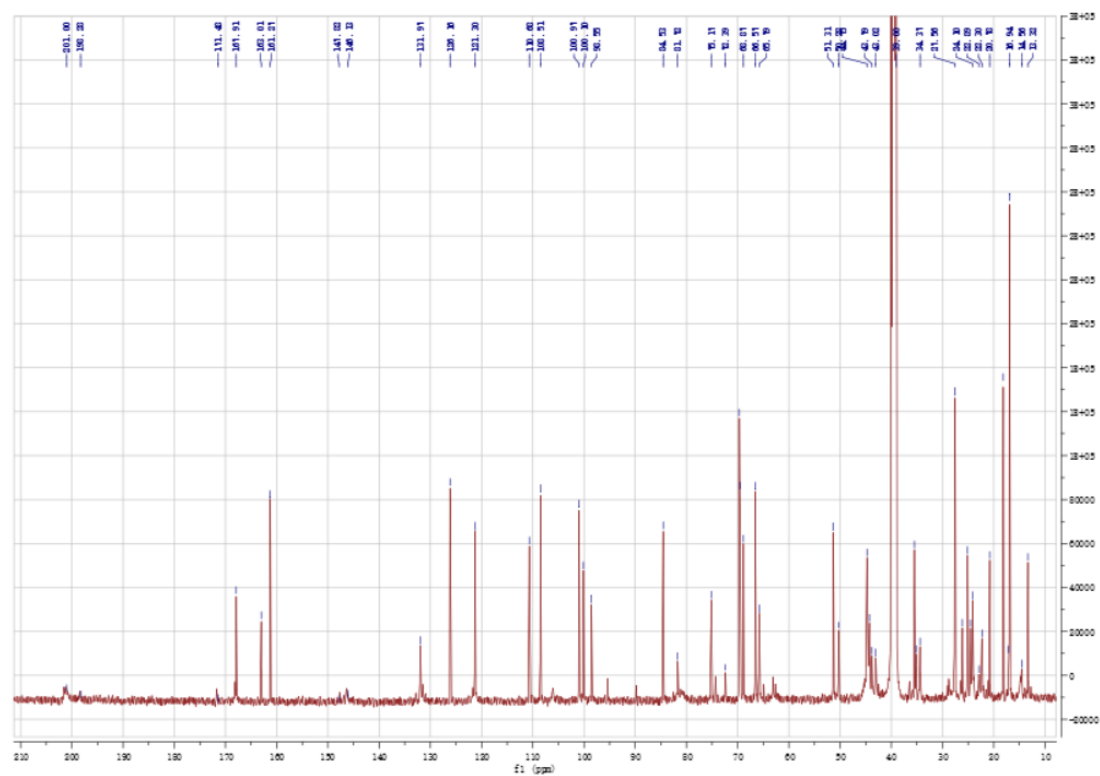

(C)

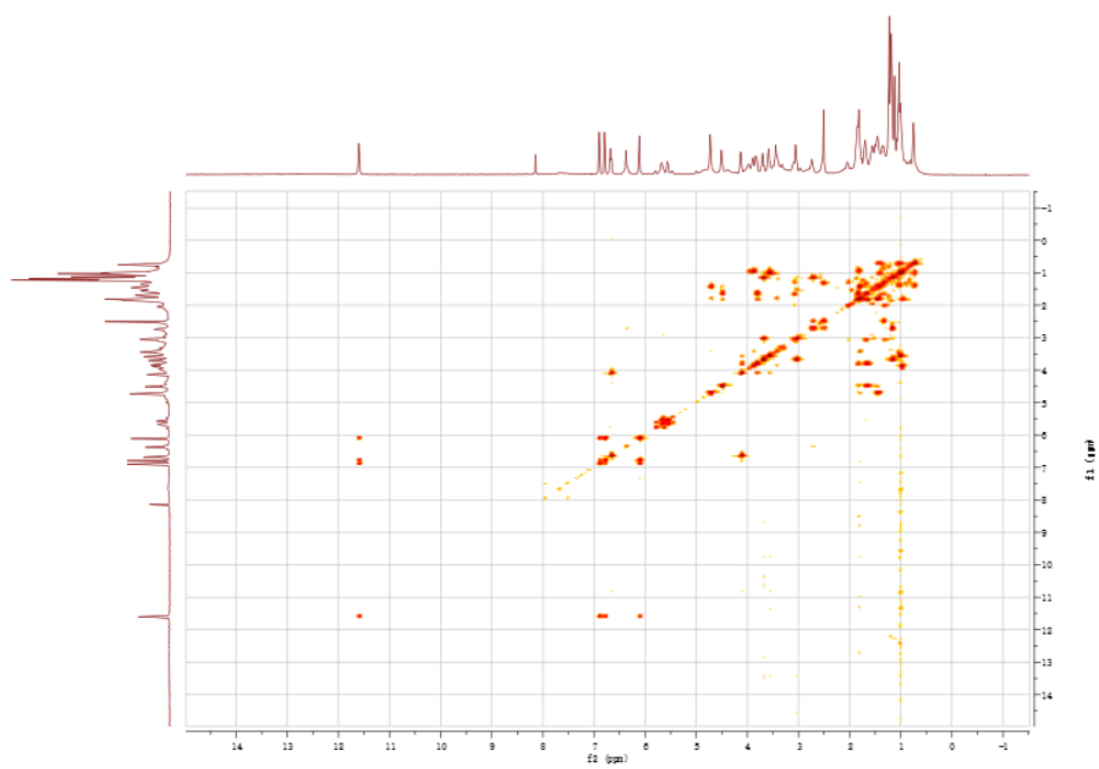

(D)

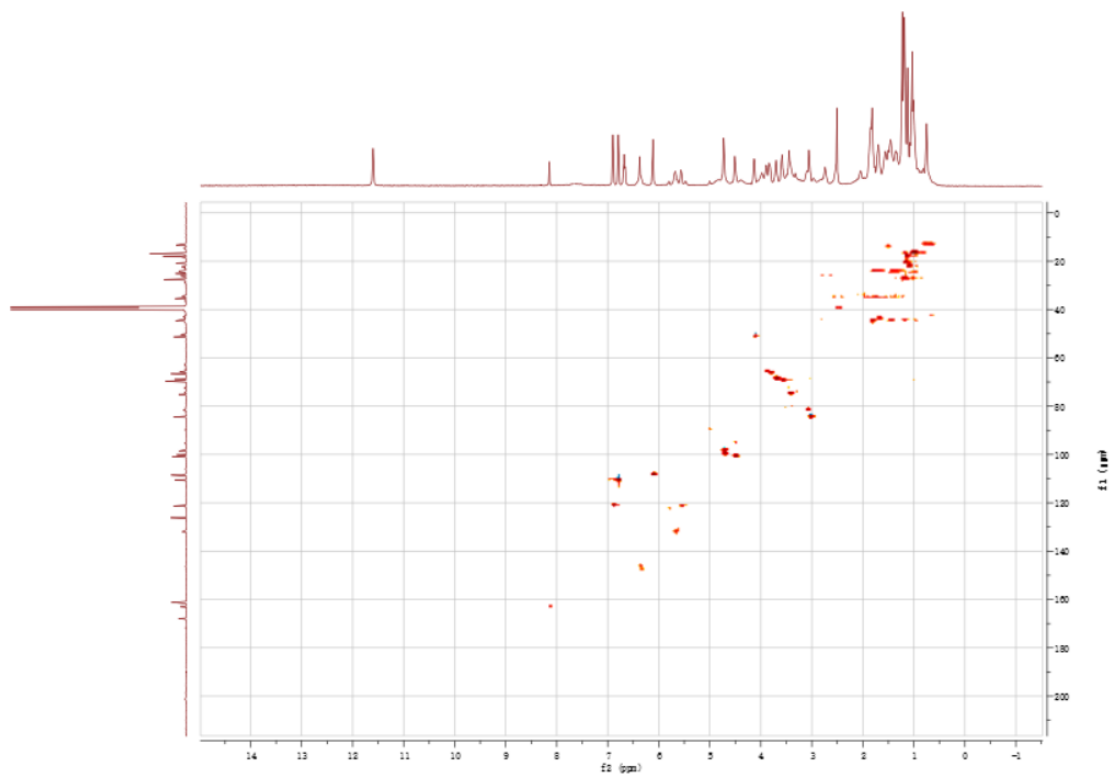



(E)

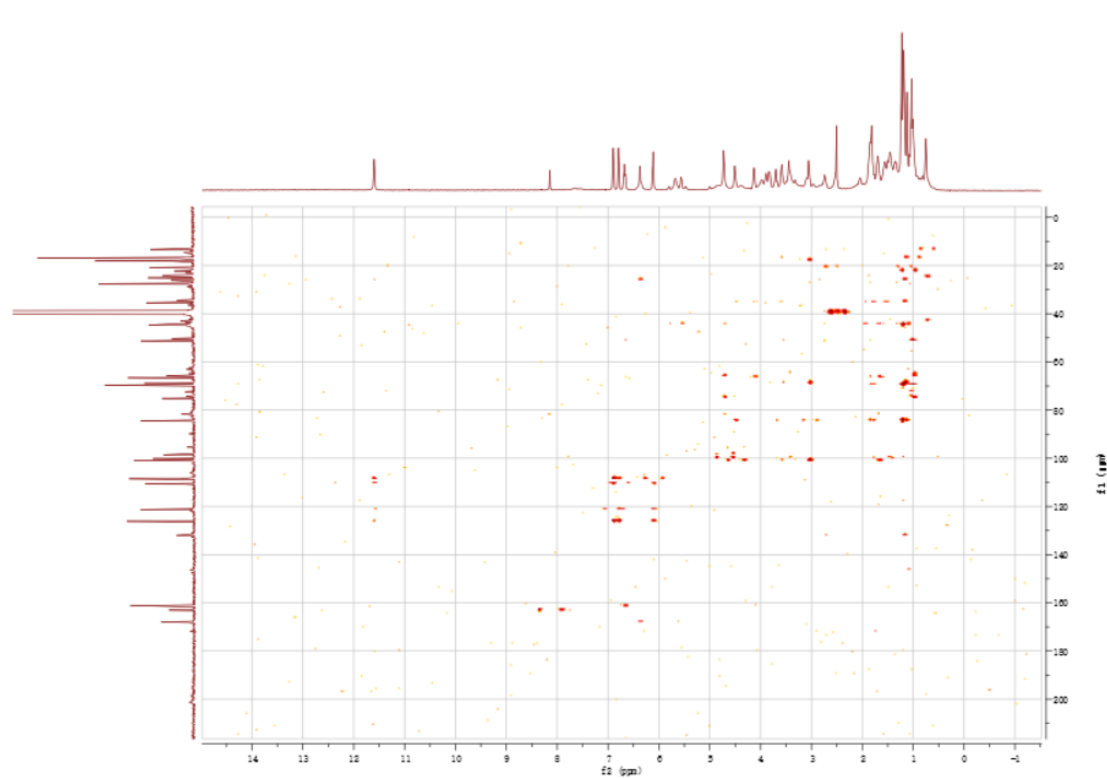

(F)

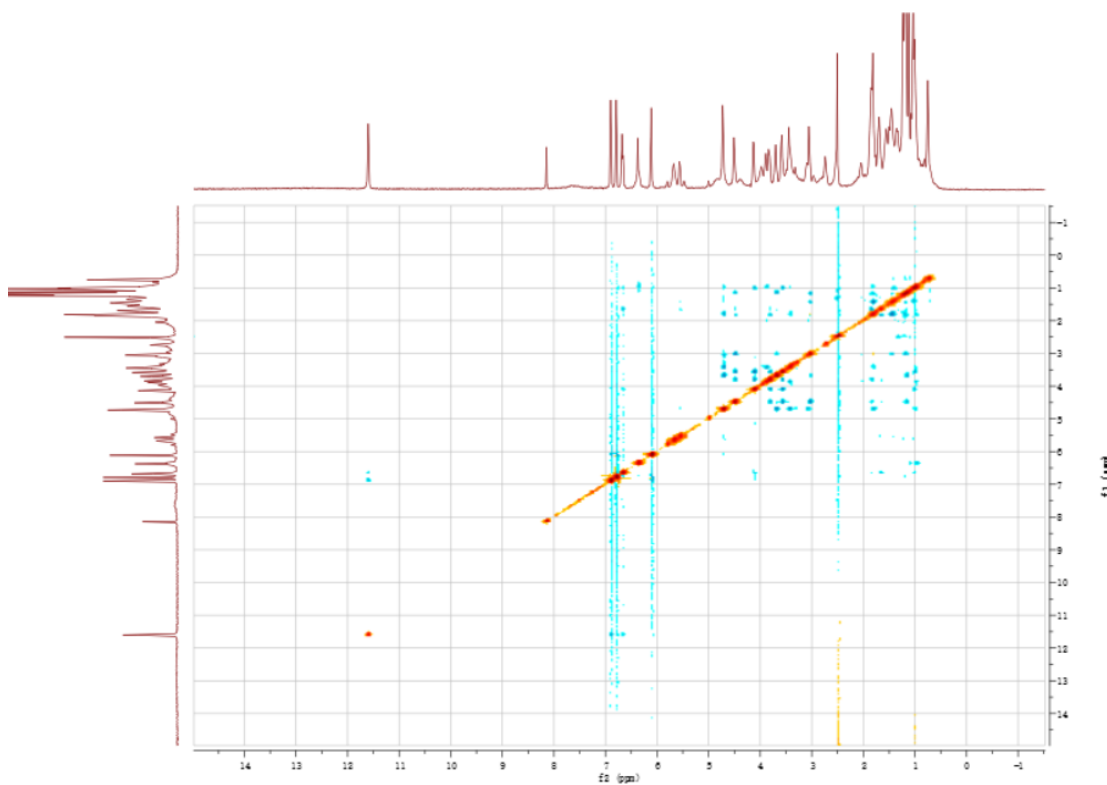



(C)

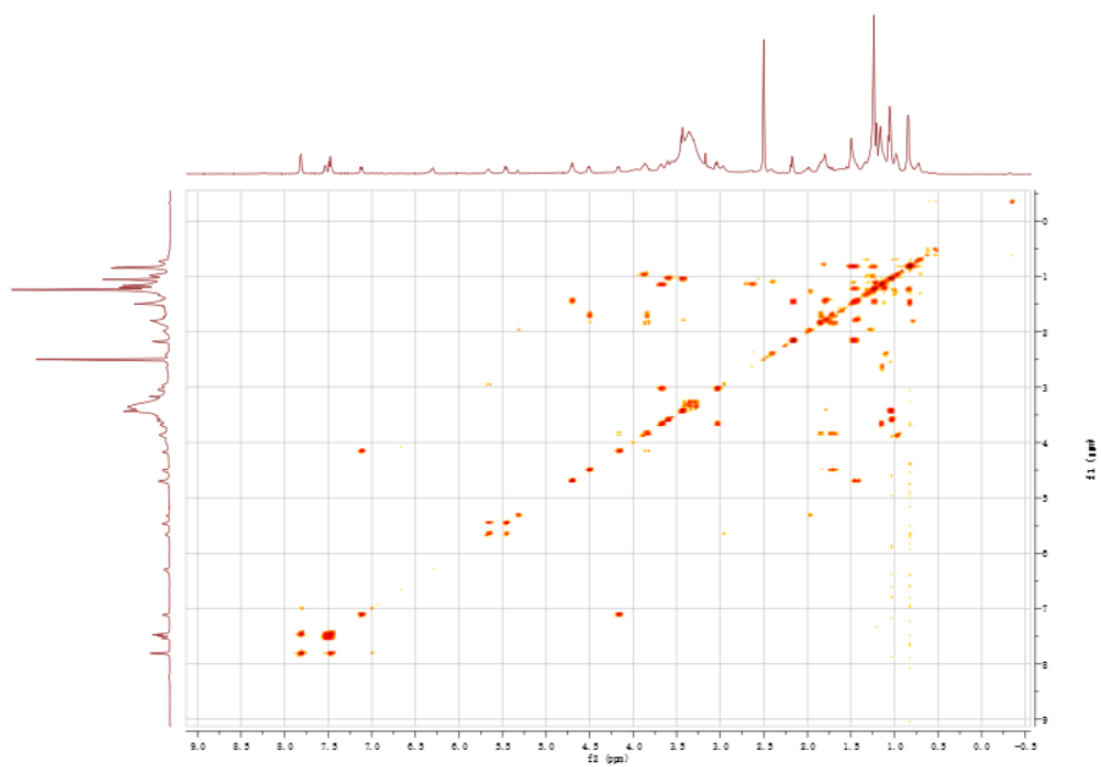

(D)

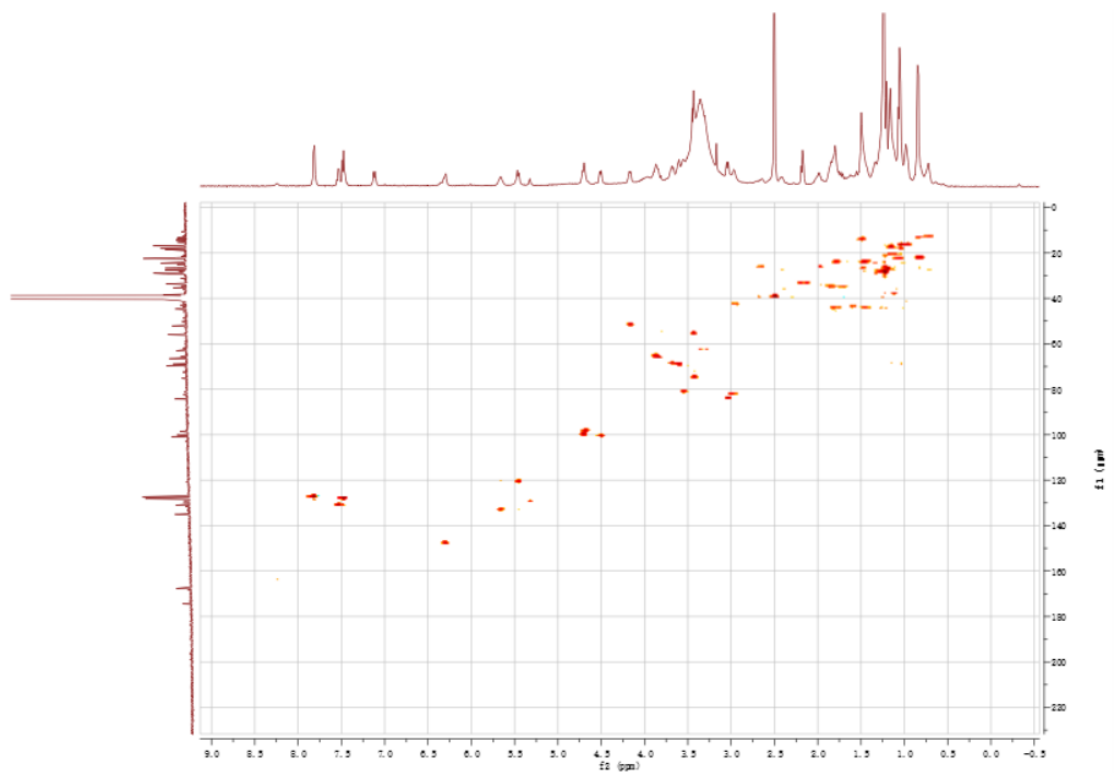

(E)

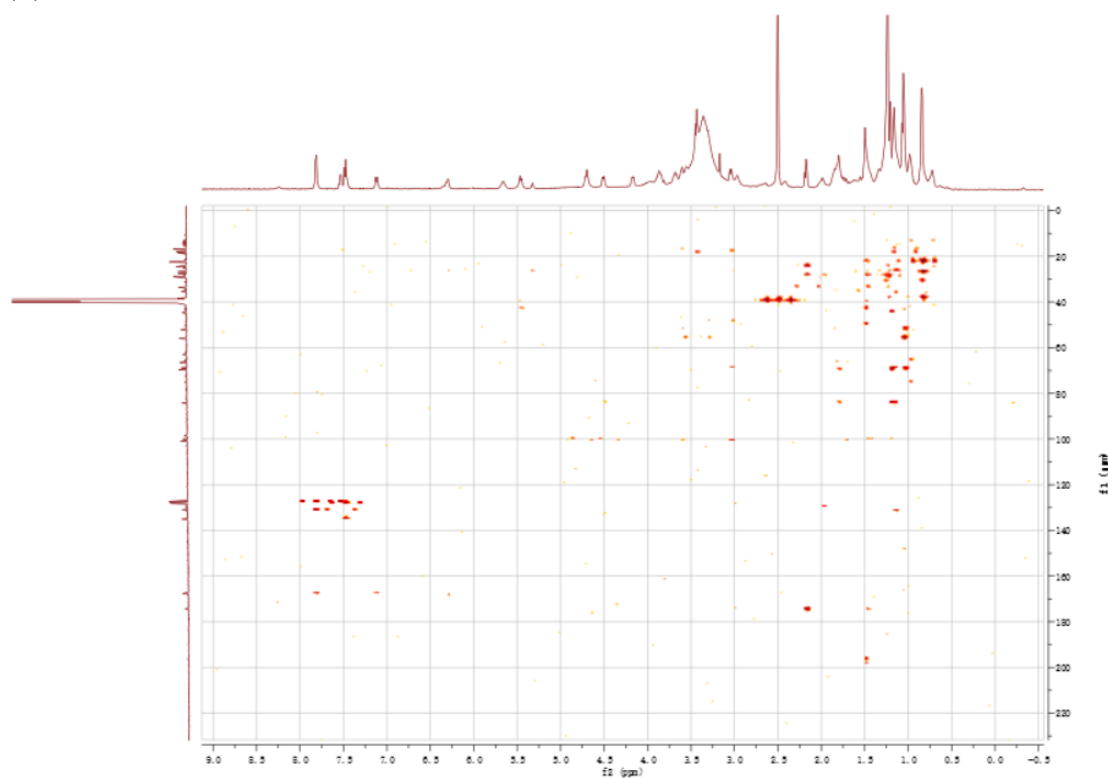

(F)

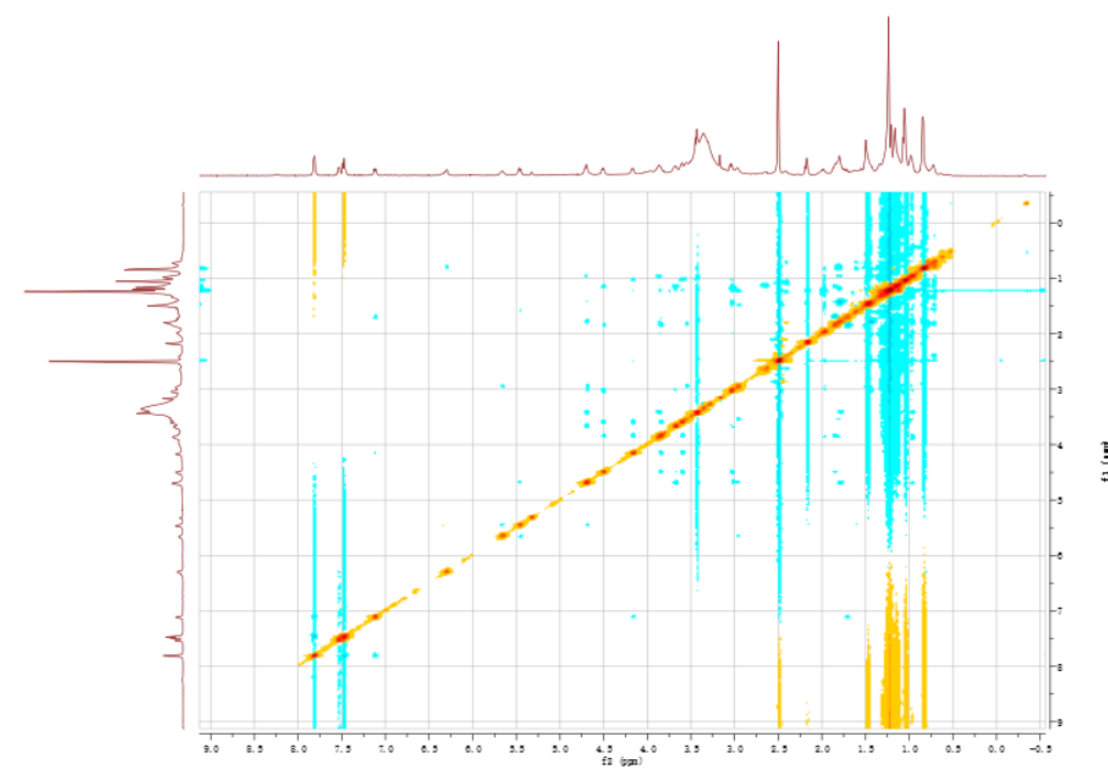

## 2.6 Detection of Products from Chemical Precursors Feeding.

### 2.6.1 Detection of product 6 from WL1001 fed with 4-aminobenzoic acid (S6).

Figure S15. HR-MS analysis of product 6

## Qualitative Analysis Report

|                               |                             |                      |                     |
|-------------------------------|-----------------------------|----------------------|---------------------|
| <b>Data Filename</b>          | 1034.d                      | <b>Sample Name</b>   | 3                   |
| <b>Sample Type</b>            | Sample                      | <b>Position</b>      | Vial 3              |
| <b>Instrument Name</b>        | Instrument 1                | <b>User Name</b>     |                     |
| <b>Acq Method</b>             | I3.m                        | <b>Acquired Time</b> | 9/8/2023 6:02:35 PM |
| <b>IRM Calibration Status</b> | Success                     | <b>DA Method</b>     | Default.m           |
| <b>Comment</b>                |                             |                      |                     |
| <b>Sample Group</b>           |                             | <b>Info.</b>         |                     |
| <b>Acquisition SW</b>         | 6200 series TOF/6500 series |                      |                     |
| <b>Version</b>                | Q-TOF B.05.01 (B5125.3)     |                      |                     |

### User Spectra

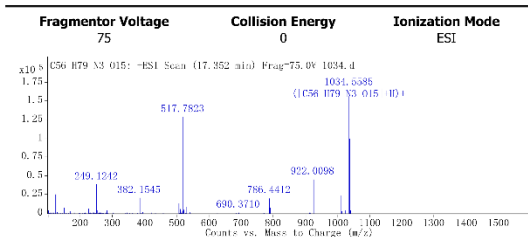

#### Peak List

| m/z       | z | Abund     | Formula        | Ion    |
|-----------|---|-----------|----------------|--------|
| 1034.5585 | 1 | 157182.42 | C56 H79 N3 O15 | (M+H)+ |
| 1035.5613 | 1 | 100677.07 | C56 H79 N3 O15 | (M+H)+ |
| 1036.5617 | 1 | 25796.52  | C56 H79 N3 O15 | (M+H)+ |
| 1037.5642 | 1 | 5039.5    | C56 H79 N3 O15 | (M+H)+ |
| 1038.5631 | 1 | 949.61    | C56 H79 N3 O15 | (M+H)+ |

#### Formula Calculator Element Limits

| Element | Min | Max |
|---------|-----|-----|
| C       | 3   | 70  |
| H       | 0   | 120 |
| O       | 1   | 20  |
| N       | 1   | 5   |

#### Formula Calculator Results

| Ion Formula    | m/z       | m/z (Calc) | Diff (ppm) | DBE | Score (MFG) |
|----------------|-----------|------------|------------|-----|-------------|
| C56 H80 N3 O15 | 1034.5585 | 1034.5584  | -0.1       | 19  | 99.99       |
| C69 H72 N5 O4  | 1034.5585 | 1034.5579  | -0.6       | 37  | 99.7        |
| C68 H76 N O8   | 1034.5585 | 1034.5565  | -1.89      | 32  | 97.09       |
| C61 H80 N O13  | 1034.5585 | 1034.5624  | 3.79       | 23  | 89.35       |
| C51 H80 N5 O17 | 1034.5585 | 1034.5544  | -3.99      | 15  | 88.34       |

--- End Of Report ---

Figure S16. HR-MS/MS analysis of product 6

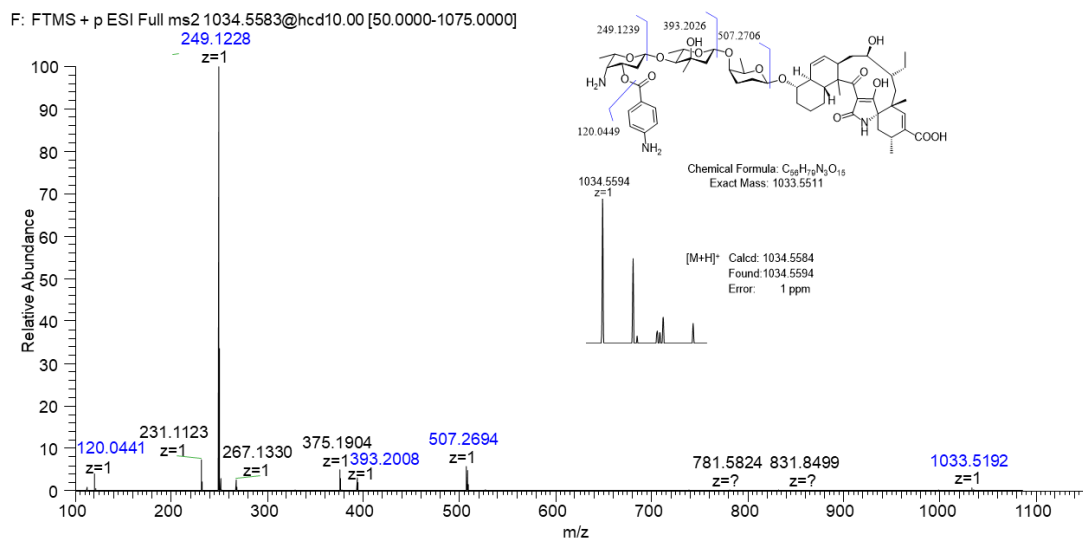

## 2.6.2 Detection of product 7 from WL1001 fed with 4-trifluoromethyl-benzoic acid (S7).

Figure S17. HR-MS of product 7.

### Qualitative Analysis Report

|                               |              |                      |                     |
|-------------------------------|--------------|----------------------|---------------------|
| <b>Data Filename</b>          | 1087.d       | <b>Sample Name</b>   | 6                   |
| <b>Sample Type</b>            | Sample       | <b>Position</b>      | Vial 6              |
| <b>Instrument Name</b>        | Instrument 1 | <b>User Name</b>     |                     |
| <b>Acq Method</b>             | I3.m         | <b>Acquired Time</b> | 9/8/2023 7:43:03 PM |
| <b>IRM Calibration Status</b> | Success      | <b>DA Method</b>     | Default.m           |
| <b>Comment</b>                |              |                      |                     |

|                       |                             |              |
|-----------------------|-----------------------------|--------------|
| <b>Sample Group</b>   |                             | <b>Info.</b> |
| <b>Acquisition SW</b> | 6200 series TOF/6500 series |              |
| <b>Version</b>        | Q-TOF B.05.01 (B5125.3)     |              |

#### User Spectra

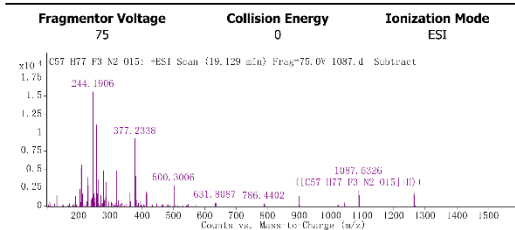

#### Peak List

| m/z       | z | Abund   | Formula           | Ion    |
|-----------|---|---------|-------------------|--------|
| 1087.5326 | 1 | 2212.89 | C57 H77 F3 N2 O15 | (M+H)+ |
| 1088.5321 | 1 | 1615.19 | C57 H77 F3 N2 O15 | (M+H)+ |
| 1089.5386 | 1 | 611.02  | C57 H77 F3 N2 O15 | (M+H)+ |

#### Formula Calculator Element Limits

| Element | Min | Max |
|---------|-----|-----|
| C       | 3   | 70  |
| H       | 0   | 120 |
| O       | 1   | 20  |
| N       | 1   | 5   |
| F       | 1   | 5   |

#### Formula Calculator Results

| Ion Formula       | m/z       | m/z (Calc) | Diff (ppm) | DBE | Score (MFG) |
|-------------------|-----------|------------|------------|-----|-------------|
| C63 H76 F N2 O13  | 1087.5326 | 1087.5326  | 0          | 27  | 100         |
| C46 H80 F5 N4 O19 | 1087.5326 | 1087.5331  | 0.5        | 7   | 99.79       |
| C49 H79 F4 N4 O18 | 1087.5326 | 1087.532   | -0.55      | 11  | 99.74       |
| C60 H77 F2 N2 O14 | 1087.5326 | 1087.5337  | 1.05       | 23  | 99.07       |
| C58 H76 F5 N2 O12 | 1087.5326 | 1087.5313  | -1.2       | 20  | 98.77       |
| C52 H78 F3 N4 O17 | 1087.5326 | 1087.5309  | -1.6       | 15  | 97.84       |
| C70 H70 F3 N4 O4  | 1087.5326 | 1087.5344  | 1.63       | 37  | 97.78       |
| C51 H80 F N4 O20  | 1087.5326 | 1087.5344  | 1.7        | 14  | 97.58       |
| C57 H78 F3 N2 O15 | 1087.5326 | 1087.5349  | 2.1        | 19  | 96.36       |
| C61 H75 F4 N2 O11 | 1087.5326 | 1087.5302  | -2.25      | 24  | 95.82       |
| C55 H77 F2 N4 O16 | 1087.5326 | 1087.5297  | -2.66      | 19  | 94.31       |
| C67 H71 F4 N4 O5  | 1087.5326 | 1087.5355  | 2.68       | 33  | 94.21       |

--- End Of Report ---

Figure S18. HR-MS/MS analysis of product 7.

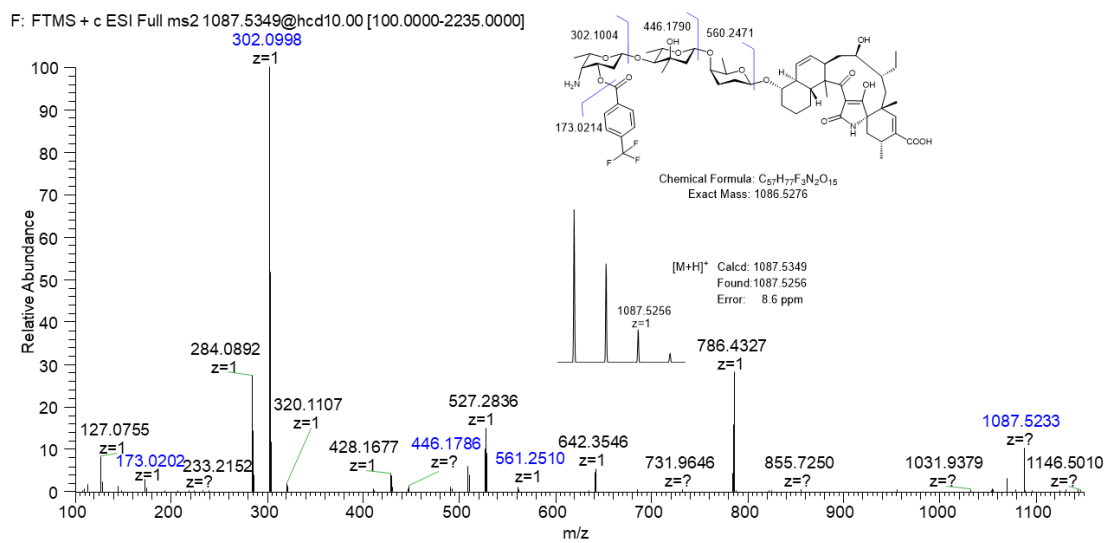



## 2.6.3 Detection of product 8 from WL1001 fed with 4-fluorobenzoic acid (S8).

Figure S19. HR-MS analysis of product 8.

### Qualitative Analysis Report

|                               |                             |                      |                     |
|-------------------------------|-----------------------------|----------------------|---------------------|
| <b>Data Filename</b>          | 1037.d                      | <b>Sample Name</b>   | 5                   |
| <b>Sample Type</b>            | Sample                      | <b>Position</b>      | Vial 5              |
| <b>Instrument Name</b>        | Instrument 1                | <b>User Name</b>     |                     |
| <b>Acq Method</b>             | I3.m                        | <b>Acquired Time</b> | 9/8/2023 7:09:31 PM |
| <b>IRM Calibration Status</b> | Success                     | <b>DA Method</b>     | Default.m           |
| <b>Comment</b>                |                             |                      |                     |
| <b>Sample Group</b>           | <b>Info.</b>                |                      |                     |
| <b>Acquisition SW</b>         | 6200 series TOF/6500 series |                      |                     |
| <b>Version</b>                | Q-TOF B.05.01 (B5125.3)     |                      |                     |

#### User Spectra

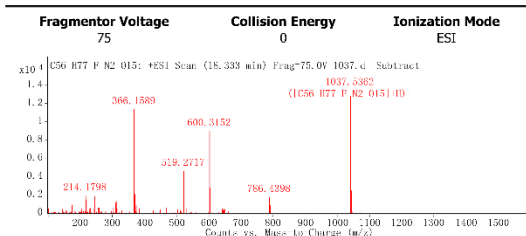

#### Peak List

| m/z       | z | Abund    | Formula          | Ion    |
|-----------|---|----------|------------------|--------|
| 1037.5362 | 1 | 12827.46 | C56 H77 F N2 O15 | (M+H)+ |
| 1038.5378 | 1 | 7591.61  | C56 H77 F N2 O15 | (M+H)+ |
| 1039.5385 | 1 | 2523.91  | C56 H77 F N2 O15 | (M+H)+ |
| 1040.5379 | 1 | 723.97   | C56 H77 F N2 O15 | (M+H)+ |
| 1041.5353 | 1 | 248.4    | C56 H77 F N2 O15 | (M+H)+ |

#### Formula Calculator Element Limits

| Element | Min | Max |
|---------|-----|-----|
| C       | 3   | 70  |
| H       | 0   | 120 |
| O       | 1   | 20  |
| N       | 1   | 5   |
| F       | 1   | 5   |

#### Formula Calculator Results

| Ion Formula       | m/z       | m/z (Calc) | Diff (ppm) | DBE | Score (MFG) |
|-------------------|-----------|------------|------------|-----|-------------|
| C64 H70 F5 N4 O3  | 1037.5362 | 1037.5363  | 0.06       | 30  | 100         |
| C45 H80 F3 N4 O19 | 1037.5362 | 1037.5363  | 0.13       | 7   | 99.99       |
| C54 H77 F4 N2 O13 | 1037.5362 | 1037.5356  | -0.55      | 16  | 99.75       |
| C51 H78 F5 N2 O14 | 1037.5362 | 1037.5368  | 0.55       | 12  | 99.74       |
| C48 H79 F2 N4 O18 | 1037.5362 | 1037.5352  | -0.97      | 11  | 99.22       |
| C67 H69 F4 N4 O2  | 1037.5362 | 1037.5351  | -1.05      | 34  | 99.09       |
| C42 H81 F4 N4 O20 | 1037.5362 | 1037.5375  | 1.24       | 3   | 98.74       |
| C69 H70 F N4 O4   | 1037.5362 | 1037.5376  | 1.31       | 37  | 98.57       |
| C57 H76 F3 N2 O12 | 1037.5362 | 1037.5345  | -1.65      | 20  | 97.76       |
| C56 H78 F N2 O15  | 1037.5362 | 1037.5381  | 1.81       | 19  | 97.33       |
| C51 H78 F N4 O17  | 1037.5362 | 1037.5341  | -2.07      | 15  | 96.53       |
| C70 H68 F3 N4 O   | 1037.5362 | 1037.534   | -2.15      | 38  | 96.28       |
| C66 H71 F2 N4 O5  | 1037.5362 | 1037.5387  | 2.42       | 33  | 95.34       |
| C60 H75 F2 N2 O11 | 1037.5362 | 1037.5333  | -2.76      | 24  | 94.03       |
| C53 H79 F2 N2 O16 | 1037.5362 | 1037.5392  | 2.91       | 15  | 93.39       |

--- End Of Report ---

**Figure S20. HR-MS/MS analysis of product 8.**

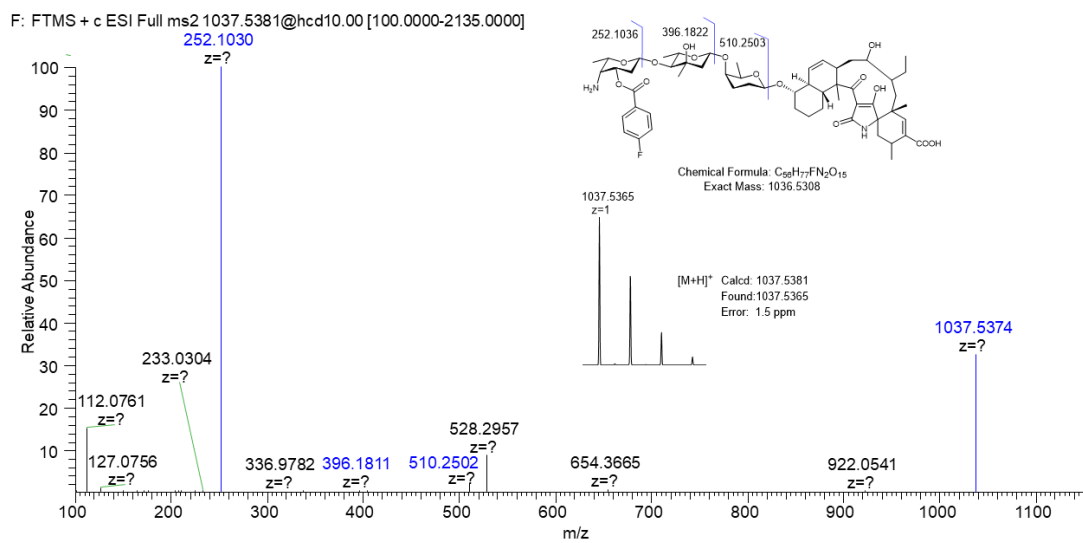

## 2.6.4 Detection of product 9 from WL1001 fed with thiophene-2-carboxylic acid (S9).

Figure S21. HR-MS analysis of product 9.

### Qualitative Analysis Report

|                               |              |                      |                      |
|-------------------------------|--------------|----------------------|----------------------|
| <b>Data Filename</b>          | 1025.d       | <b>Sample Name</b>   | Sample35             |
| <b>Sample Type</b>            | Sample       | <b>Position</b>      | Vial 24              |
| <b>Instrument Name</b>        | Instrument 1 | <b>User Name</b>     |                      |
| <b>Acq Method</b>             | I3.m         | <b>Acquired Time</b> | 1/29/2024 2:14:59 PM |
| <b>IRM Calibration Status</b> | Success      | <b>DA Method</b>     | Default.m            |
| <b>Comment</b>                |              |                      |                      |

|                       |                             |              |
|-----------------------|-----------------------------|--------------|
| <b>Sample Group</b>   |                             | <b>Info.</b> |
| <b>Acquisition SW</b> | 6200 series TOF/6500 series |              |
| <b>Version</b>        | Q-TOF B.05.01 (B5125.3)     |              |

#### User Spectra

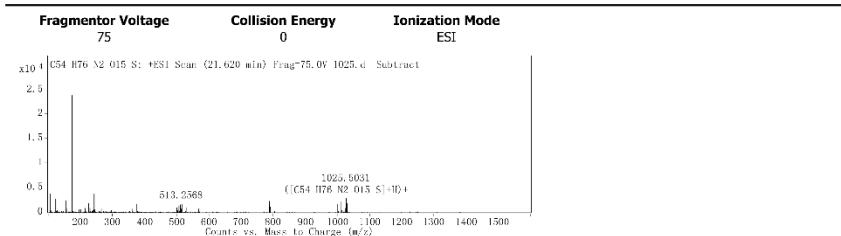

#### Peak List

| m/z       | z | Abund   | Formula          | Ion    |
|-----------|---|---------|------------------|--------|
| 1025.5031 | 1 | 2991.11 | C54 H76 N2 O15 S | (M+H)+ |
| 1026.5041 | 1 | 1966.57 | C54 H76 N2 O15 S | (M+H)+ |
| 1027.5013 | 1 | 1011.16 | C54 H76 N2 O15 S | (M+H)+ |
| 1028.5030 | 1 | 308.06  | C54 H76 N2 O15 S | (M+H)+ |

#### Formula Calculator Element Limits

| Element | Min | Max |
|---------|-----|-----|
| C       | 3   | 70  |
| H       | 0   | 120 |
| O       | 1   | 20  |
| N       | 1   | 5   |
| S       | 1   | 2   |

#### Formula Calculator Results

| Ion Formula       | m/z       | m/z (Calc) | Diff (ppm) | DBE | Score (MFG) |
|-------------------|-----------|------------|------------|-----|-------------|
| C46 H81 N4 O17 S2 | 1025.5031 | 1025.5033  | 0.16       | 9   | 99.98       |
| C67 H69 N4 O4 S   | 1025.5031 | 1025.5034  | 0.3        | 36  | 99.93       |
| C54 H77 N2 O15 S  | 1025.5031 | 1025.5039  | 0.8        | 18  | 99.47       |
| C58 H77 N2 O10 S2 | 1025.5031 | 1025.5014  | -1.65      | 22  | 97.79       |
| C49 H77 N4 O17 S  | 1025.5031 | 1025.4999  | -3.13      | 14  | 92.49       |
| C64 H73 N4 O4 S2  | 1025.5031 | 1025.5068  | 3.59       | 31  | 90.38       |

--- End Of Report ---

**Figure S22. HR-MS/MS analysis of product 9.**

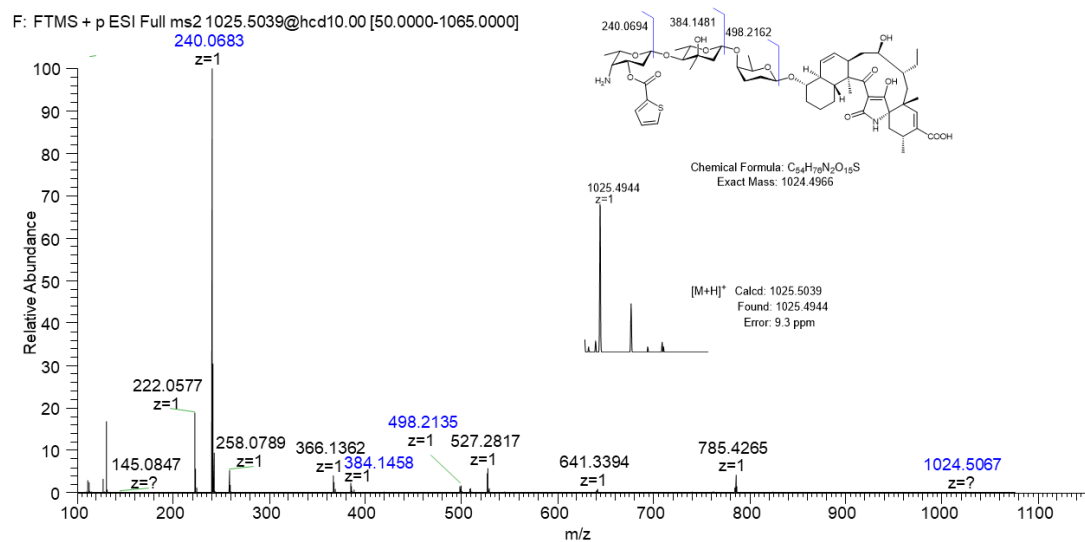

## 2.6.5 Detection of product 10 from WL1001 fed with 1H-indole-2-carboxylic acid (S10).

Figure S23. HR-MS analysis of product 10.

### Qualitative Analysis Report

|                               |                             |                      |                      |
|-------------------------------|-----------------------------|----------------------|----------------------|
| <b>Data Filename</b>          | yinduo2-1.d                 | <b>Sample Name</b>   | Sample35             |
| <b>Sample Type</b>            | Sample                      | <b>Position</b>      | Vial 25              |
| <b>Instrument Name</b>        | Instrument 1                | <b>User Name</b>     |                      |
| <b>Acq Method</b>             | I3.m                        | <b>Acquired Time</b> | 1/29/2024 2:48:25 PM |
| <b>IRM Calibration Status</b> | Success                     | <b>DA Method</b>     | Default.m            |
| <b>Comment</b>                |                             |                      |                      |
| <b>Sample Group</b>           |                             | <b>Info.</b>         |                      |
| <b>Acquisition SW</b>         | 6200 series TOF/6500 series |                      |                      |
| <b>Version</b>                | Q-TOF B.05.01 (B5125.3)     |                      |                      |

#### User Spectra

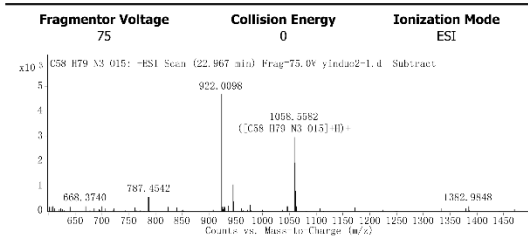

| m/z       | z | Abund   | Formula        | Ion    |
|-----------|---|---------|----------------|--------|
| 1058.5582 | 1 | 3003.54 | C58 H79 N3 O15 | (M+H)+ |
| 1059.5562 | 1 | 1963.25 | C58 H79 N3 O15 | (M+H)+ |
| 1060.564  | 1 | 845     | C58 H79 N3 O15 | (M+H)+ |
| 1061.5719 | 1 | 234     | C58 H79 N3 O15 | (M+H)+ |
| 1382.9848 |   | 238.64  |                |        |

#### Formula Calculator Element Limits

| Element | Min | Max |
|---------|-----|-----|
| C       | 3   | 60  |
| H       | 0   | 120 |
| O       | 1   | 30  |
| N       | 1   | 5   |

#### Formula Calculator Results

| Ion Formula    | m/z       | m/z (Calc) | Diff (ppm) | DBE | Score (MFG) |
|----------------|-----------|------------|------------|-----|-------------|
| C58 H80 N3 O15 | 1058.5582 | 1058.5584  | 0.18       | 21  | 99.97       |
| C45 H88 N O26  | 1058.5582 | 1058.5589  | 0.67       | 3   | 99.62       |
| C70 H76 N O8   | 1058.5582 | 1058.5565  | -1.57      | 34  | 97.97       |
| C46 H84 N5 O22 | 1058.5582 | 1058.5602  | 1.93       | 8   | 96.93       |
| C53 H80 N5 O17 | 1058.5582 | 1058.5544  | -3.62      | 17  | 90.09       |
| C63 H80 N O13  | 1058.5582 | 1058.5624  | 3.99       | 25  | 88.25       |
| C52 H84 N O21  | 1058.5582 | 1058.5530  | -4.88      | 12  | 83.51       |

--- End Of Report ---

Figure S24. HR-MS/MS analysis of product 10.

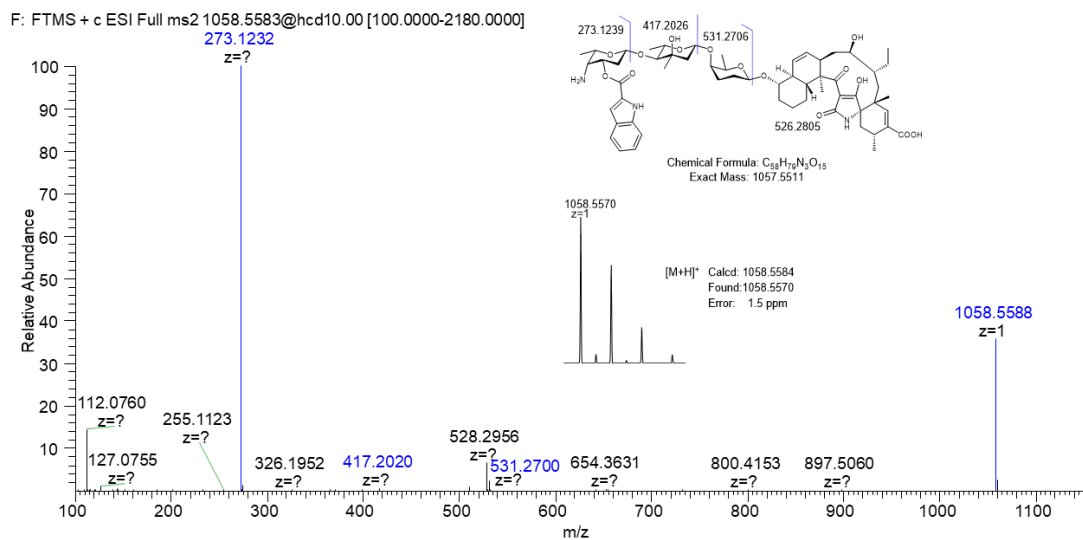

## 2.6.6 Detection of product 11 from WL1001 fed with 1H-indole-5-carboxylic acid (S11).

Figure S25. HR-MS analysis of product 11.

### Qualitative Analysis Report

|                               |              |                      |                     |
|-------------------------------|--------------|----------------------|---------------------|
| <b>Data Filename</b>          | 1058-5.d     | <b>Sample Name</b>   | 4                   |
| <b>Sample Type</b>            | Sample       | <b>Position</b>      | Vial 4              |
| <b>Instrument Name</b>        | Instrument 1 | <b>User Name</b>     |                     |
| <b>Acq Method</b>             | I3.m         | <b>Acquired Time</b> | 9/8/2023 6:36:05 PM |
| <b>IRM Calibration Status</b> | Success      | <b>DA Method</b>     | Default.m           |
| <b>Comment</b>                |              |                      |                     |

|                       |                             |              |
|-----------------------|-----------------------------|--------------|
| <b>Sample Group</b>   |                             | <b>Info.</b> |
| <b>Acquisition SW</b> | 6200 series TOF/6500 series |              |
| <b>Version</b>        | Q-TOF B.05.01 (B5125.3)     |              |

#### User Spectra

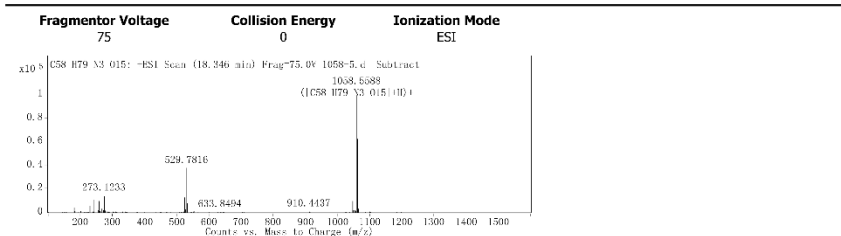

#### Peak List

| m/z       | z | Abund    | Formula        | Ion    |
|-----------|---|----------|----------------|--------|
| 1058.5588 | 1 | 99702.39 | C58 H79 N3 O15 | (M+H)+ |
| 1059.5613 | 1 | 62705.68 | C58 H79 N3 O15 | (M+H)+ |
| 1060.5639 | 1 | 17392.91 | C58 H79 N3 O15 | (M+H)+ |
| 1061.5655 | 1 | 3838.68  | C58 H79 N3 O15 | (M+H)+ |
| 1062.5655 | 1 | 899.1    | C58 H79 N3 O15 | (M+H)+ |

#### Formula Calculator Element Limits

| Element | Min | Max |
|---------|-----|-----|
| C       | 3   | 70  |
| H       | 0   | 120 |
| O       | 1   | 20  |
| N       | 1   | 5   |

#### Formula Calculator Results

| Ion Formula    | m/z       | m/z (Calc) | Diff (ppm) | DBE | Score (MFG) |
|----------------|-----------|------------|------------|-----|-------------|
| C58 H80 N3 O15 | 1058.5588 | 1058.5584  | -0.38      | 21  | 99.88       |
| C70 H76 N O8   | 1058.5588 | 1058.5565  | -2.13      | 34  | 96.29       |

--- End Of Report ---

**Figure S26. HR-MS/MS analysis of product 11.**

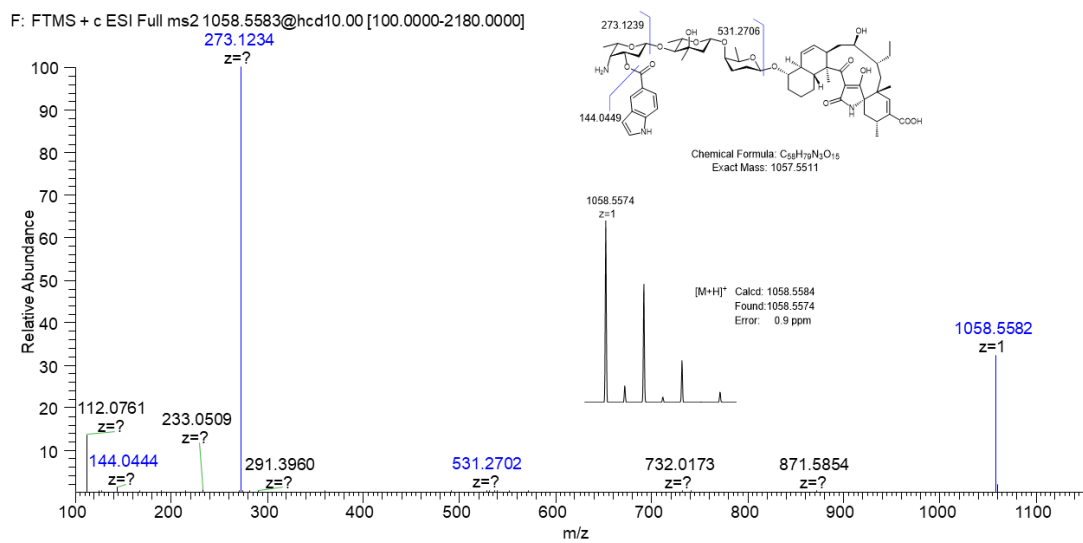



### 3 Supplementary references

1. M.R. Green, J.Sambrook, *Molecular Cloning: A Laboratory Manual* 4 th edn, 2012.
2. T.Keiser, M.J. Bibb, M.J. Buttner, K.F. Chater, D.A. Hopwood, *Practical Streptomyces Genetics*, 2000.
3. Q. Wu, Z. Wu, X. Qu and W. Liu, Insights into pyrroindomycin biosynthesis reveal a uniform paradigm for tetramate/tetronate formation, *J. Am. Chem. Soc.*, 2012, **134**, 17342-17345.
4. W. De Laurentis, L. Khim, J. L. Anderson, A. Adam, K. A. Johnson, R. S. Phillips, S. K. Chapman, K. H. van Pee and J. H. Naismith, The second enzyme in pyrrolnitrin biosynthetic pathway is related to the heme-dependent dioxygenase superfamily, *Biochemistry*, 2007, **46**, 12393-12404.
5. X. Zhu, K. H. van Pee and J. H. Naismith, The ternary complex of PrnB (the second enzyme in the pyrrolnitrin biosynthesis pathway), tryptophan, and cyanide yields new mechanistic Insights into the indolamine dioxygenase superfamily, *J. Biol. Chem.*, 2010, **285**, 21126-21133.
6. J. Liu, T. Ng, Z. Rui, O. Ad and W. Zhang, Unusual Acetylation-Dependent Reaction Cascade in the Biosynthesis of the Pyrroloindole Drug Physostigmine, *Angew. Chem. Int. Ed.*, 2014, **126**, 140-143.
7. J. M. Schuller, G. Zocher, M. Liebhold, X. Xie, M. Stahl, S. M. Li and T. Stehle, Structure and catalytic mechanism of a cyclic dipeptide prenyltransferase with broadsubstrate promiscuity, *J. Mol. Biol.*, 2012, **422**, 87-99.
8. E. T. Miller, O. V. Tsodikov and S. Garneau-Tsodikova, Structural insights into the diverse prenylating capabilities of DMATS prenyltransferases, *Nat. Prod. Rep.*, 2024, **41**, 113-147.
9. W. Y. Tian, C. H. Sun, M. Zheng, J. R. Harmer, M. J. Yu, Y. A. Zhang, H. D. Peng, D. Q. Zhu, Z. X. Deng, S. L. Chen, M. Mobli, X. Y. Jia, X. D. Qu, Efficient biosynthesis of heterodimeric C3-aryl pyrroloindoline alkaloids, *Nat. Commun.*, 2018, **9**, 4428-4436.
10. T. Saruwatari, F. Yagishita, T. Mino, H. Noguchi, K. Hotta, K. Watanabe, Cytochrome P450 as Dimerization Catalyst in Diketopiperazine Alkaloid Biosynthesis, *ChemBioChem*, 2014, **15**, 656-659.
11. B. D. Ames, X. Y. Liu, C.T. Walsh, Enzymatic Processing of Fumiquinazoline F: A Tandem Oxidative-Acylation Strategy for the Generation of Multicyclic Scaffolds in Fungal Indole Alkaloid Biosynthesis, *Biochemistry*, 2010, **49**, 8564-8576.
12. S. Y. Li, J. M. Finefield, J. D. Sunderhaus, T. J. McAfoos, R. M. Williams, D. H. Sherman, Biochemical Characterization of NotB as an FAD-Dependent Oxidase in the Biosynthesis of Notoamide Indole Alkaloids, *J. Am. Chem. Soc.*, 2012, **134**, 788-791.
13. C. Sun, W. Tian, Z. Lin and X. Qu, Biosynthesis of pyrroloindoline-containing natural products, *Nat. Prod. Rep.*, 2022, **39**, 1721-1765.
